# Supplementary material for: Bimodal fluorogenic sensing of matrix proteolytic signatures in lung cancer
Source: Royal Society of Chemistry journal article supplement (doi:10.1039/c8ob01790e), 2018-01-01
Supplement: c8ob01790e1.pdf [file c8ob01790e1.pdf]

1  
2  
3  
4  
5  
6  
7  
8  
9  
10  
11  
12  
13  
14  
15  
16  
17  
18  
19  
20  
21  
22  
23  
24  
25  
26  
27  
28  
29  
30  
31

## SUPPLEMENTARY INFORMATION

### BIMODAL FLUOROGENIC SENSING OF MATRIX PROTEOLYTIC SIGNATURES IN LUNG CANCER

Alicia Megia-Fernandez<sup>a#</sup>, Bethany Mills<sup>b#</sup>, Chesney Michels<sup>b</sup>, Sunay V. Chankeshwara<sup>a</sup>, Nikola Krstajić<sup>c</sup>, Chris Haslett<sup>b</sup>, Kevin Dhaliwal<sup>\*b</sup> & Mark Bradley<sup>\*a</sup>

<sup>a</sup>School of Chemistry and the EPSRC IRC Proteus, University of Edinburgh, Joseph Black Building, David Brewster Road, Edinburgh, EH9 3FJ, UK.

<sup>b</sup>MRC Centre of Inflammation Research, Queen's Medical Research Institute, University of Edinburgh, 47 Little France Crescent, EH16 4TJ, Edinburgh, UK.

<sup>c</sup>Institute for Integrated Micro and Nano Systems, School of Engineering, University of Edinburgh, EH9 3JL, UK.

<sup>#</sup>Authors contributed equally.

\*E-mail: Mark.Bradley@ed.ac.uk and Kev.Dhaliwal@ed.ac.uk

#### Contents:

- Supplementary Data (Figures S1-S7)
- Materials and Methods (Chemistry)
- Materials and methods (Biology)
- Peptide sequence optimization of the MMP-2/9/13 substrate
- References

32  
33  
34

## SUPPLEMENTARY DATA

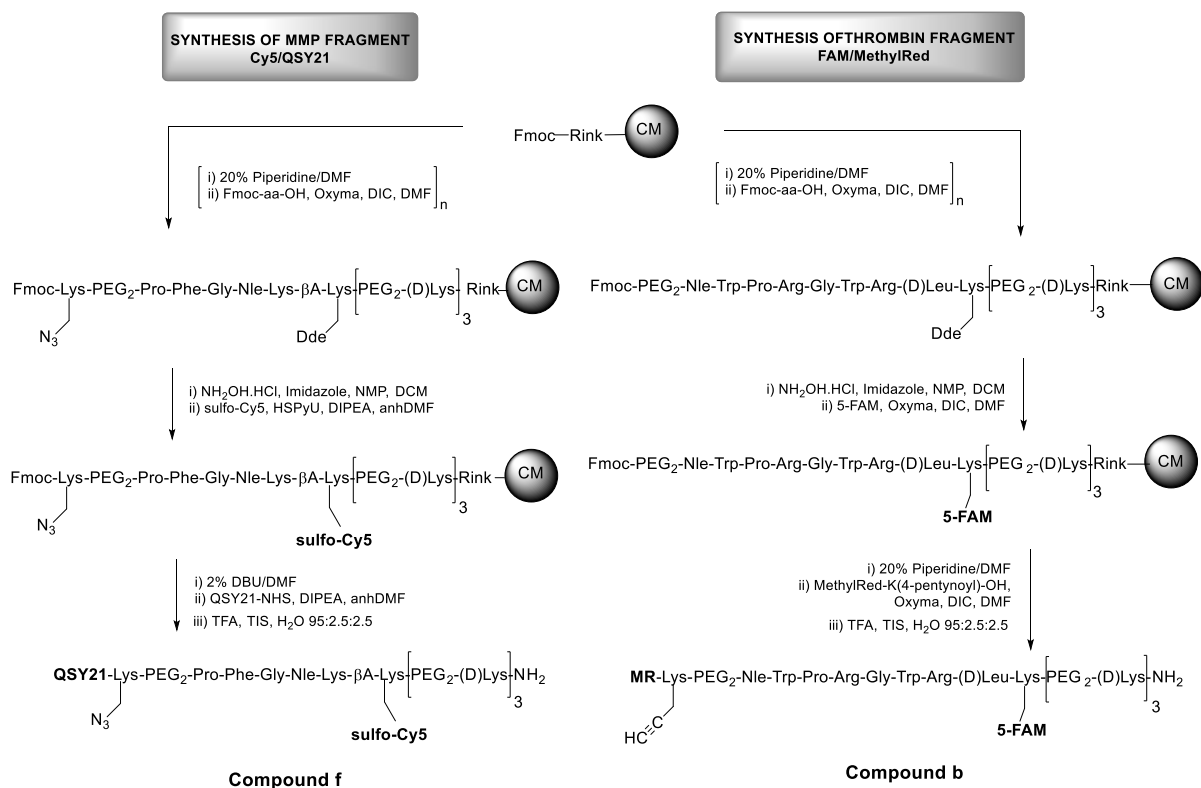

35  
36  
37  
38  
39  
40  
41  
42

**Scheme S1.** Synthetic route to the two fragments of the dual-probe **3** by SPPS. \*For clarity the acid labile protecting groups of the amino acids have been omitted. CM = Chemmatrix™ resin

Left: MMP cleavable peptide containing the azide, Sulfo-Cy5 and QSY21 groups (compound **f**).

Right: Thrombin cleavable peptide containing the alkyne, Methyl Red (MR) and 5-Carboxyfluorescein (5-FAM) groups (compound **b**).

Full details to the synthetic routes are provided in the Materials and Methods section below.

43  
44  
45

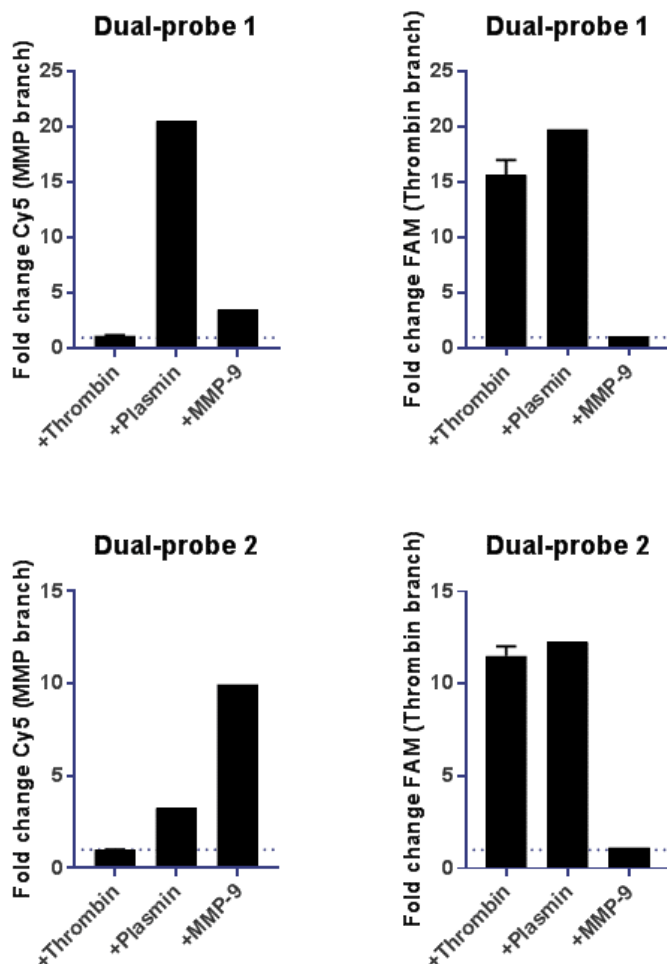

46

47 **Figure S1. Enzyme specificity of the 1st and 2nd generation dual-probes:** Data shows the fold  
48 change in fluorescence over background provided by dual-probes **1** and **2** with Thrombin, MMP-9 and  
49 Plasmin after 10 minutes using a multi-well plate fluorimeter with excitation/emission 485/528 nm  
50 (FAM, thrombin branch) and 640/670 nm (Cy5, MMP branch).

51 Top left: The dual probe 1 was analysed for increase in Cy5 intensity generated by cleavage of the  
52 MMP-sequence. Note the huge cleavage caused by Plasmin.

53 Top right: The dual probe 1 was analysed for increase in FAM intensity generated by activation of the  
54 Thrombin-based sequence. Note cleavage by both Thrombin and Plasmin.

55 Bottom left: The dual probe 2 showed much better cleavage by MMP than Plasmin.

56 Bottom right: The dual probe 2 was still cleaved by Thrombin and Plasmin.

57

58

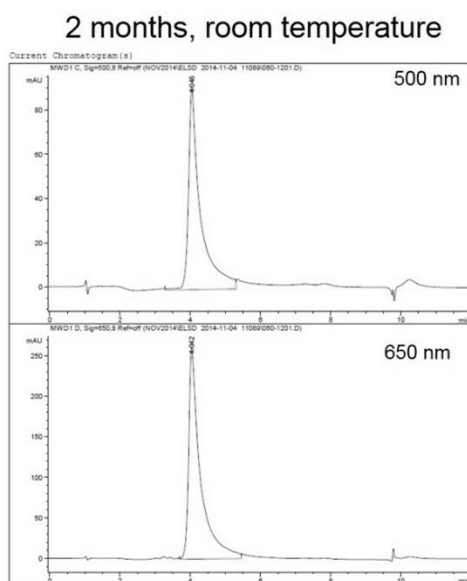

59

60 **Figure S2.** Stability data: HPLC trace of compound **3** after 2 months in PBS at room temperature with  
61 detection at 500 and 650 nm.

62

63

64

65

66

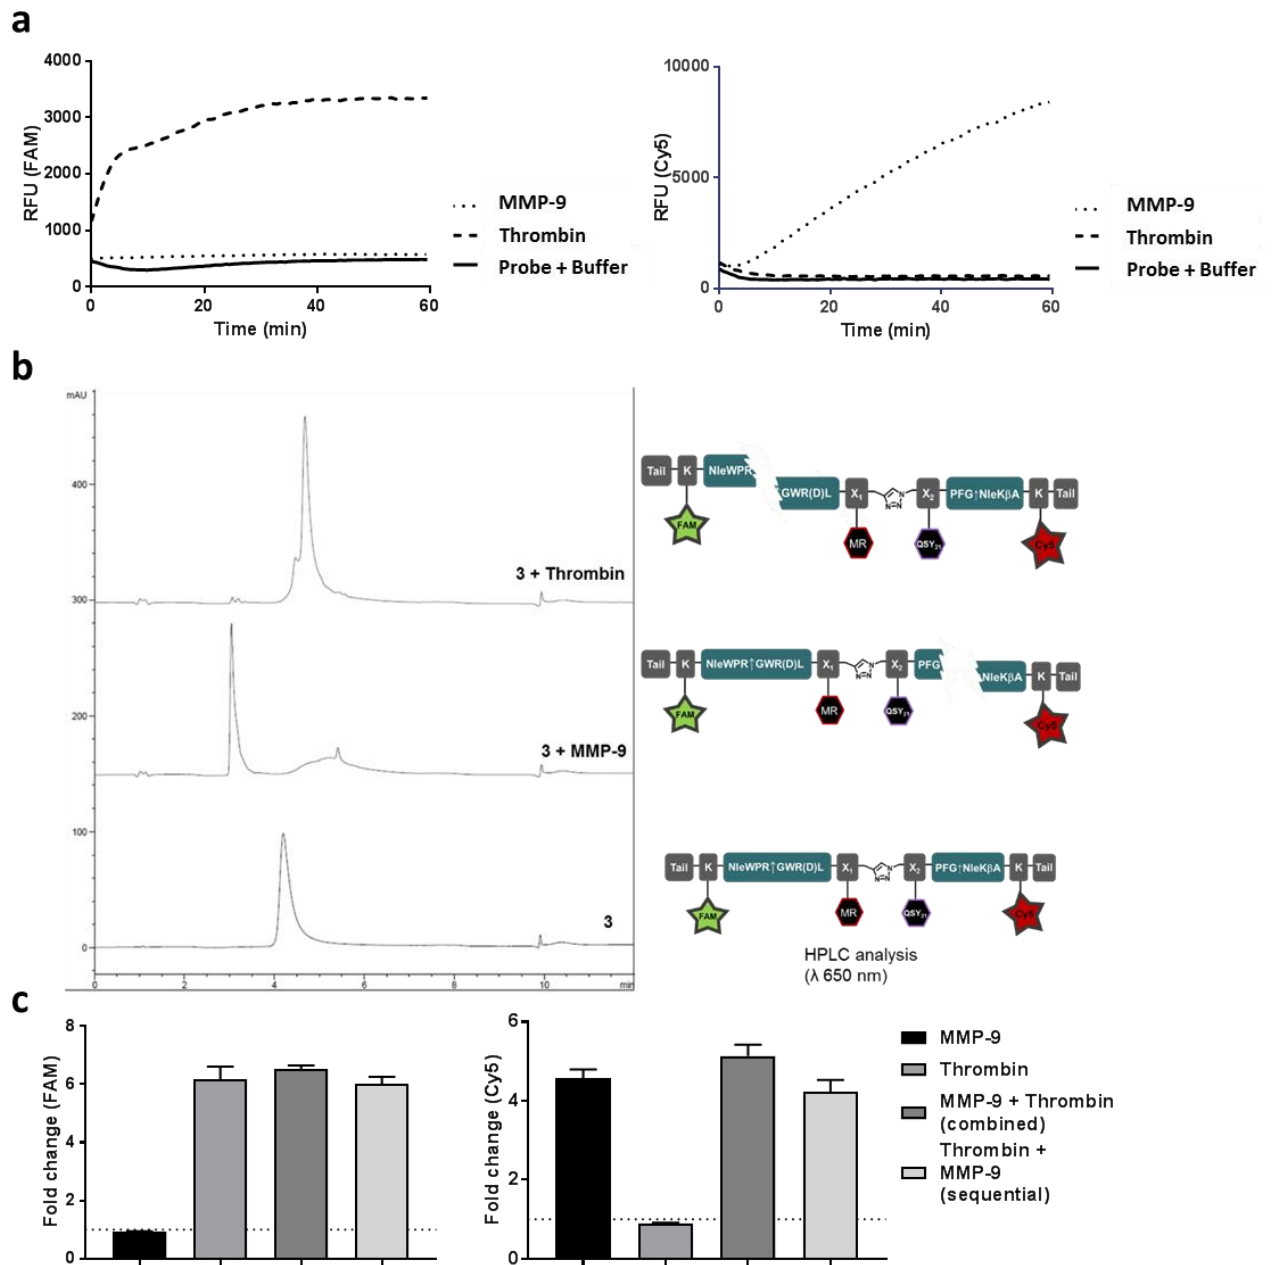

67

68 **Figure S3. Dual-probe 3 is optically quiet in its native state with specific cleavage demonstrated**  
 69 **by HPLC analysis.** Dual-probe 3 was incubated with MMP-9, thrombin or buffer. Cleavage and  
 70 subsequent activation of the probe were determined by: (a) fluorescence (relative fluorescence units,  
 71 RFU) with ex/em 485/528 (FAM), 640/670 (Cy5) and (b) HPLC analysis with absorbance detection at  
 72 650 nm before (lower trace) and after treatment with MMP-9 (middle trace) or Thrombin (upper trace).  
 73 After MMP-9 cleavage the fragment containing Cy5 increased in polarity, while after thrombin  
 74 cleavage the fragment containing Cy5 decreased in polarity and the retention time was slightly longer.  
 75 (c) Dual probe 3 incubated with either MMP-9, Thrombin or both (either combined or added  
 76 sequentially). Fold changes were calculated from enzyme free controls. Where enzymes were added  
 77 sequentially, initial incubations with the first enzyme were for 60 minutes. Data is plotted after 10  
 78 minutes for each condition/combination or after the second enzyme is added. [(FAM) ex/em 485/528,  
 79 (Cy5) ex/em 640/670]. Error bars show s.e.m.

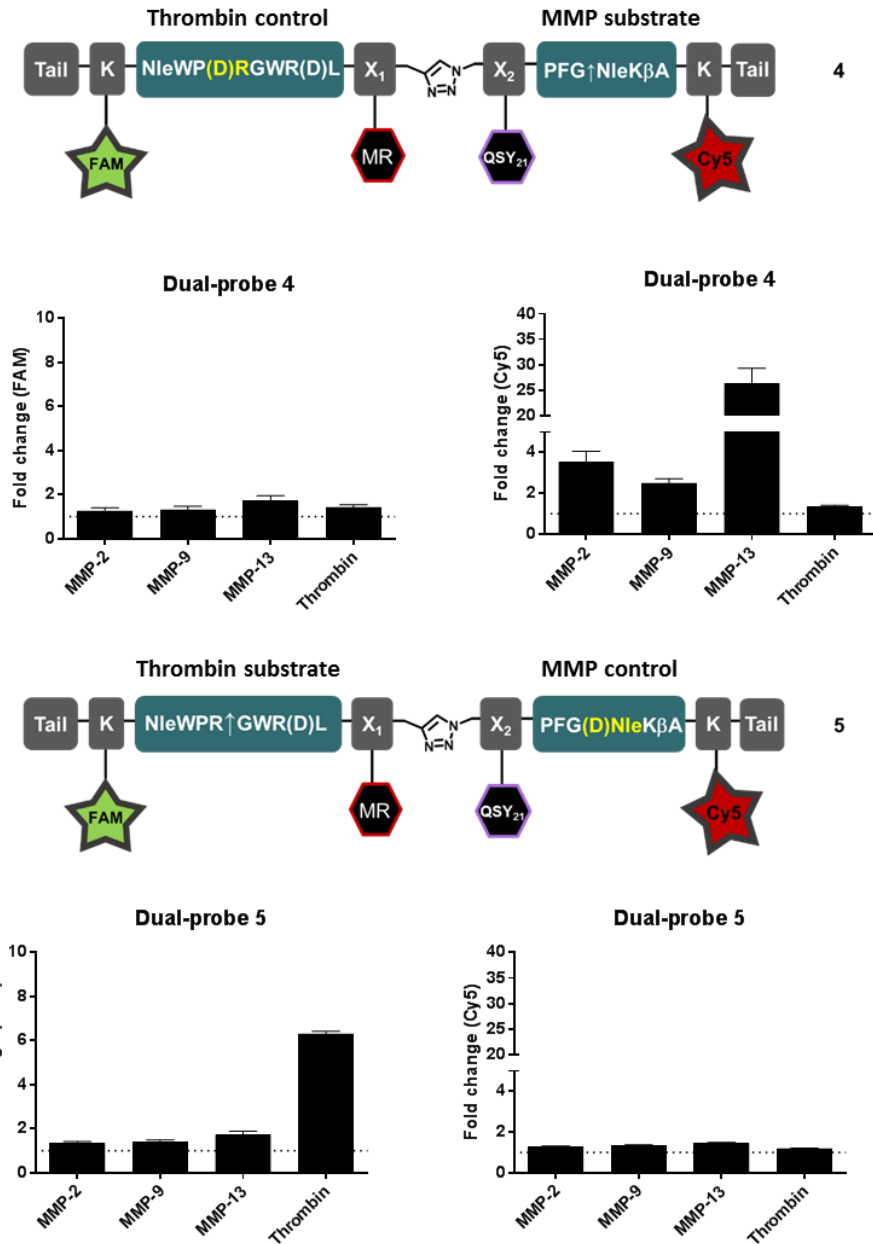

81

82 **Figure S4. Substitution of L-amino acids for D-amino acids in the peptide cleavage sites prevents**  
 83 **probe activation.** Specificity of each target peptide sequence for MMP and thrombin (Thm) was  
 84 confirmed by positioning a D-amino acid into the cleavage site of the thrombin branch (control dual-  
 85 probe 4) and the MMP branch (control dual-probe 5) and incubation with MMP or thrombin. Fold  
 86 changes [(FAM) ex/em 485/528, (Cy5) ex/em 640/670] refer to relative change in fluorescence intensity  
 87 compared to enzyme-free controls at 10 min.

88

89 **Dual-probe 3 was cleaved by activated neutrophil supernatant *ex vivo***

90 Upon degranulation of activated human neutrophils, a plethora of cytokines, reactive oxygen species  
91 and antimicrobial peptides<sup>[1]</sup> as well as proMMPs and human neutrophil elastase (HNE)<sup>[2]</sup> are released  
92 into the extracellular environment. HNE is able to cleave proMMP-9 into its active form<sup>[3]</sup>. Dual-probe  
93 **3** (+/- 20  $\mu$ M marimastat) was incubated with supernatants from freshly isolated/activated neutrophils.  
94 The Cy5 signal from dual-probe **3** was elevated 4.7-fold within 20 minutes of probe addition and was  
95 increased by 26-fold at 60 min (Fig. 3a, Fig. S5), comparable to that achieved by recombinant MMP-9  
96 (6.2-fold within 20 min and 21-fold by 60 min). Cy5 signal elevation by activated neutrophil supernatant  
97 was significantly reduced in the presence of marimastat (\*\*P = 0.0019) with just a 1.9-fold increase  
98 observed after 20 mins (identical to that observed with non-activated neutrophils) (Fig. S5a). No  
99 increase in FAM signal was observed under any of these conditions (Fig. S5a).

100

101 **Dual-probe 3 was cleaved by thrombin activity within platelet rich plasma *ex vivo***

102 Platelet rich plasma (PRP) was utilised as a complex biologically relevant source of thrombin. Dual-  
103 probe **3** was incubated with PRP extracted from healthy whole human blood. Due to a lag phase before  
104 thrombin activation<sup>[4]</sup> no cleavage of dual-probe **3** by thrombin in PRP was initially observed (Fig. S5b),  
105 however by 60 min, FAM signal was elevated 4.3 fold (compared to 7.6-fold increase for purified  
106 thrombin) (Fig. 3b). The activation of dual-probe **3** was completely inhibited by the presence of AT3  
107 for both thrombin and the PRP conditions (P < 0.0001). No activation of the Cy5 branch was observed  
108 after 60 minutes (Fig. S5c).

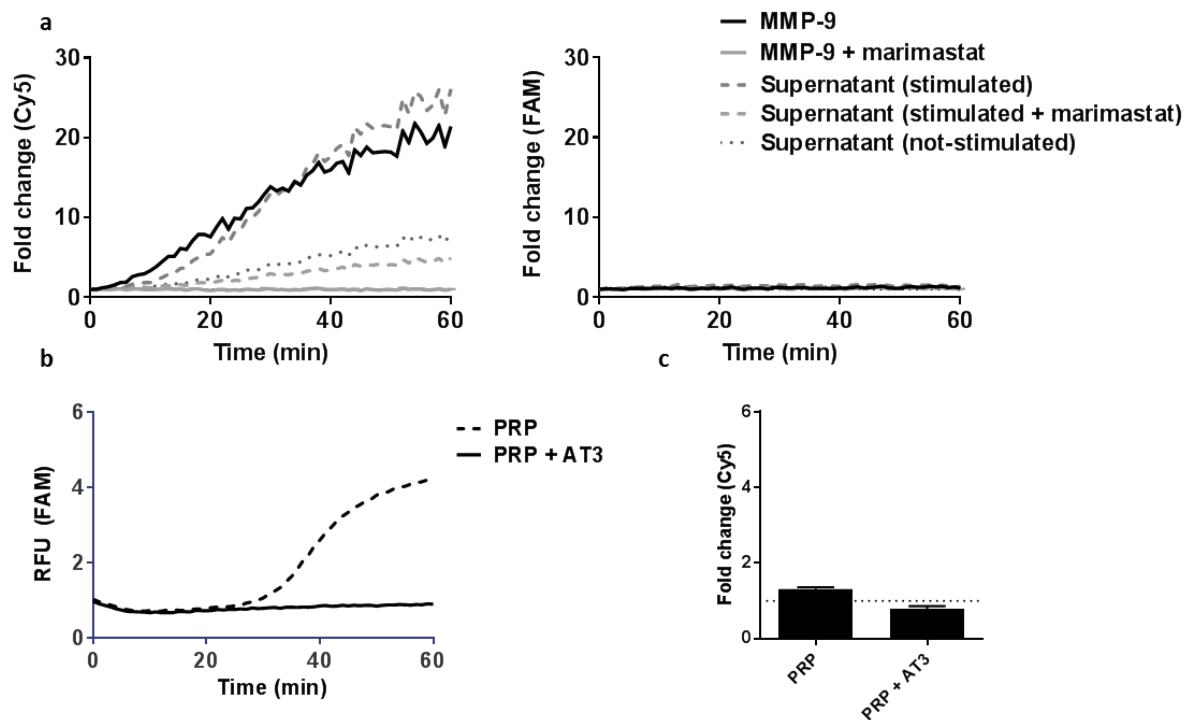

110

111

112 **Figure S5. Dual-probe 3 was specifically activated within complex biological samples.**

113 (a) Activation of dual-probe 3 by supernatants from stimulated and non-stimulated neutrophils over 60  
 114 min. The MMP inhibitor marimastat was pre-incubated with supernatants collected from stimulated  
 115 neutrophils. Increase in Cy5 and FAM signal was measured. Data shows the mean of two independent  
 116 replicates performed in duplicate. (b) Dual-probe 3 was activated by platelet rich plasma (PRP). This  
 117 activation was quenched when the thrombin inhibitor anti-thrombin III (AT3) was pre-incubated with  
 118 the PRP. (c) No off-target activation of the MMP branch was measured after 60 min with the PRP. Data  
 119 shows mean of three independent replicates performed in duplicate. Error bars represent s.e.m

120



121

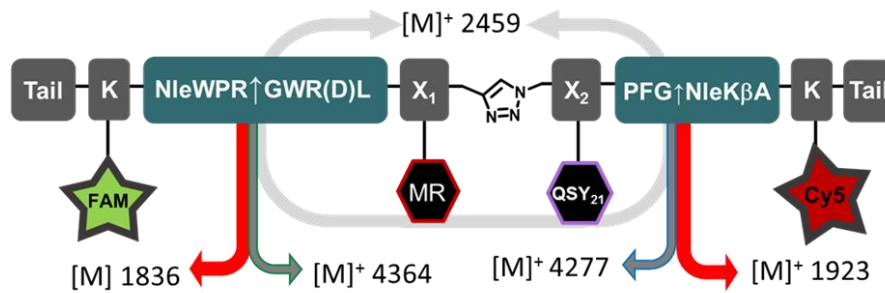

122

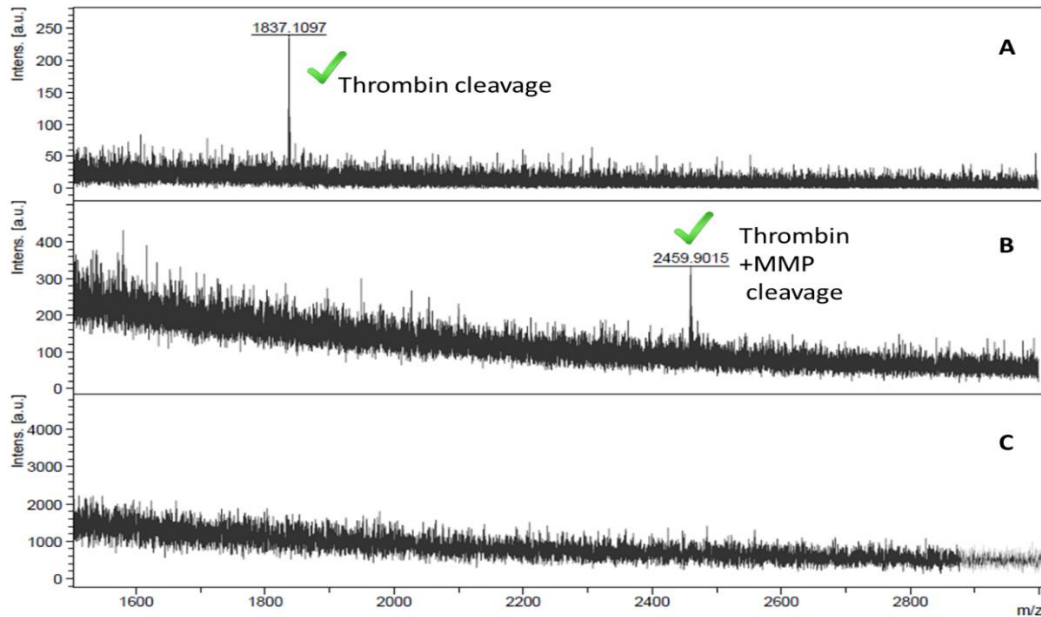

123 **Figure S6. MALDI-TOF MS analysis confirmed the specific cleavage of dual-probe 3 following**  
124 **enzymatic reaction with human carotid samples. (A)** Samples analysed directly by MALDI-TOF  
125 MS showing a peak at  $m/z$  1837.1097 (calc. for  $C_{88}H_{131}N_{20}O_{23}$   $[M+H]^+$ : 1837.1325) corresponding to  
126 one of the fragments caused by thrombin cleavage. **(B)** Samples analysed after ZipTip™ (Millipore)  
127 treatment showing a peak at  $m/z$  2459.9015 (calc. for  $C_{129}H_{158}N_{25}O_{23}S^+$   $[M]^+$ : 2458.8945) corresponding  
128 to the central fragment after thrombin and MMP cleavage. **(C)** Control sample (untreated).

129

130 Whilst fold-changes in fluorescent signal were observed to be modest by imaging with this technique  
131 (Fig 4), negative controls did not increase in fluorescence and specificity of probe cleavage by MMPs  
132 and thrombin was confirmed by MALDI-TOF MS analysis. The global enzymatic levels on the surface  
133 of the plaque could be limited for a number of reasons. The extent of plaque in each surgical resection  
134 was varied, and it would not be expected that the whole of the excised tissue would be highly active in  
135 MMP. Additionally, washing of the atherosclerotic plaque in PBS was necessary following surgical  
136 extraction, and this would likely have removed enzyme. Despite this, activated dual-probe 3 was  
137 detected by imaging and MALDI-TOF MS.

138

139

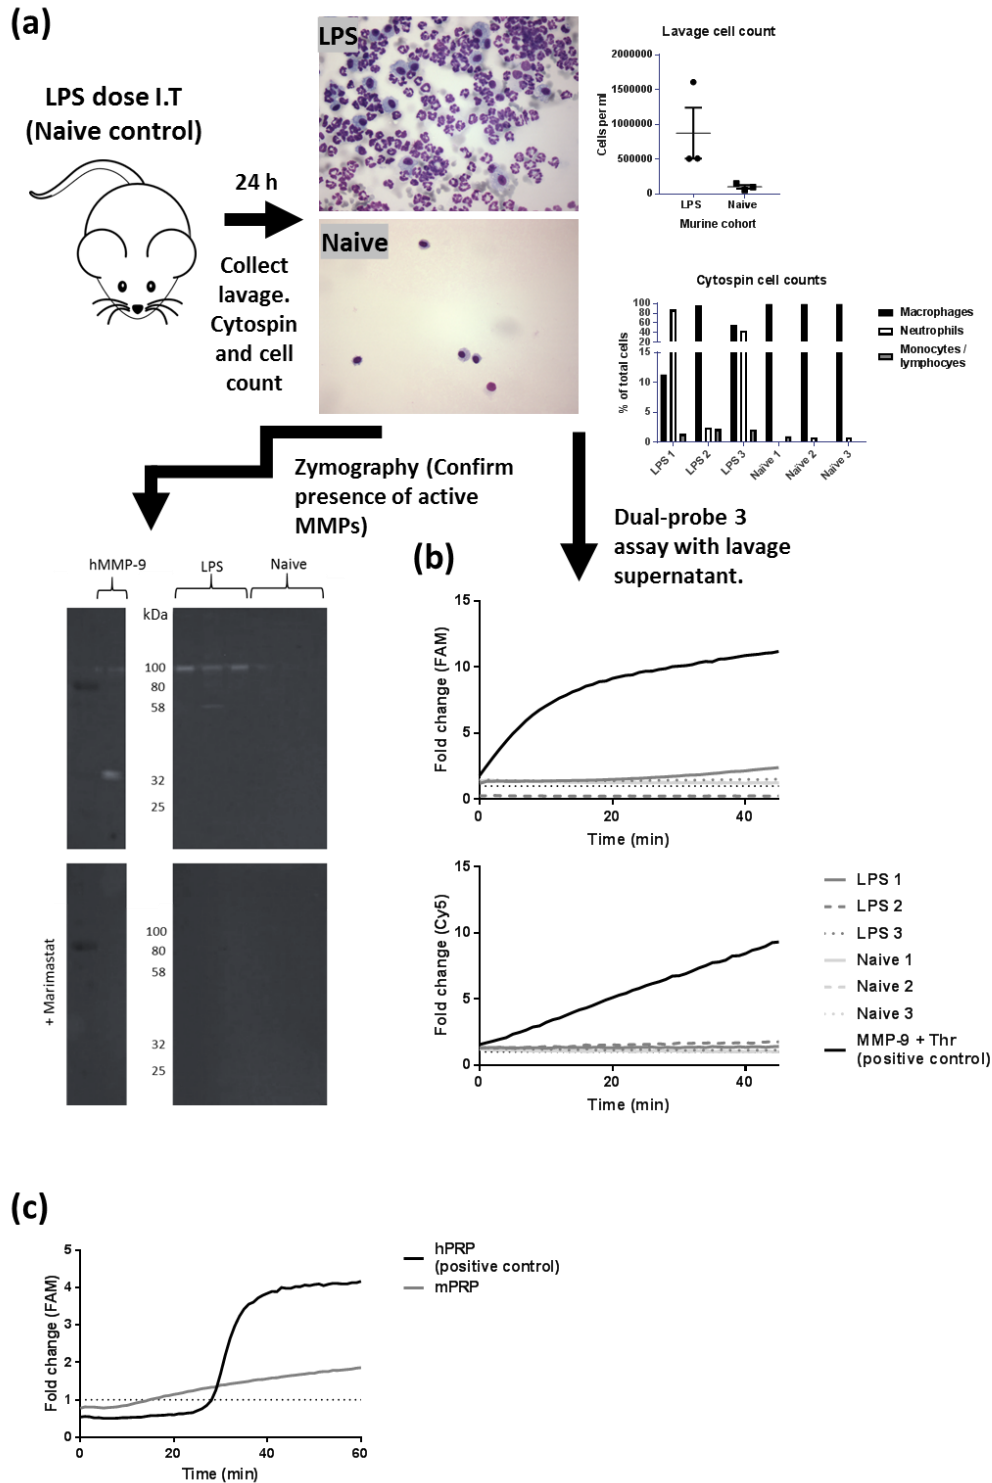

140

141 **Figure S7. Dual probe 3 was not cleaved by murine proteolytic (MMP and Thrombin) enzymes.**  
 142 (a) LPS treatment (by intratracheal route) to murine lungs causes inflammation, with massive cellular  
 143 increases, primarily by neutrophils, as shown in the cytospins (top), compared to naïve controls. Active  
 144 MMP (murine MMP-9, 92 kDa) was present in all lavage samples from LPS treated mice, confirmed  
 145 by gelatin based zymography. This was not present in the lavage from naïve mice. (b, c) Dual-probe 3  
 146 was incubated with the lavage fluid and platelet rich plasma (PRP) collected from the LPS murine  
 147 model, and with control human MMP-9 and thrombin. Cleavage and subsequent activation  
 148 was determined by measuring the relative fluorescence increase (compared to buffer only control) [ex/em  
 149 485/528 nm (FAM) and 640/670 nm (Cy5)].

## MATERIALS AND METHODS (CHEMISTRY)

150

151

### 152 **1. General :**

153 Commercially available reagents were used without further purification. Methyl Red and 4-pentynoic  
154 acid were purchased from Sigma, 5-Carboxyfluorescein was purchased from Carbosynth. Ltd. Fmoc-  
155 Lys(N<sub>3</sub>)-OH, [2-[2-(Fmoc-amino)ethoxy]ethoxy]acetic acid and 2-((2-azidoethoxy)ethoxy)acetic acid  
156 were purchased from Iris Biotech. QSY21-NHS ester was prepared according to a previously reported  
157 procedure.<sup>[5]</sup> NMR spectra were recorded using Bruker AC spectrometers operating at 500MHz for 1H.  
158 Chemical shifts are reported on the  $\delta$  scale in ppm and are referenced to residual non-deuterated solvent  
159 resonances in deuterated solvents. Normal phase purifications by column chromatography were carried  
160 out on silica gel 60 (230-400 mesh). Analytical reverse-phase high-performance liquid chromatography  
161 (RP-HPLC) was performed on an Agilent 1100 system equipped with a Discovery C18 reverse-phase  
162 column (5 cm x 4.6 mm, 5  $\mu$ m) with a flow rate of 1 mL/min and eluting with H<sub>2</sub>O/CH<sub>3</sub>CN/HCOOH  
163 (95/5/0.1) to H<sub>2</sub>O/CH<sub>3</sub>CN/HCOOH (5/95/0.1), over 6 min, holding at 95% ACN for 2 min, with  
164 detection at 254, 500 and 650 nm and by evaporative light scattering. Semi-preparative RP-HPLC was  
165 performed on an Agilent 1100 system equipped with a Zorbax Eclipse XDB-C18 reverse-phase column  
166 (250 x 9.4 mm, 5  $\mu$ m) with a flow rate 2.0 mL/min and eluting with 0.1% HCOOH in H<sub>2</sub>O (A) and  
167 0.1% HCOOH in CH<sub>3</sub>CN (B), with a gradient of 5 to 95% B over 30 min and additional isocratic period  
168 of 5 min. Electrospray ionization mass spectrometry (ESI-MS) analyses were carried out on an Agilent  
169 Technologies LC/MSD Series 1100 quadrupole mass spectrometer (QMS) in an ESI mode. MALDI  
170 spectra were acquired on a Bruker Ultraflex extreme MALDI TOF/TOF with a matrix solution of sinapic  
171 acid (10 mg/mL) in H<sub>2</sub>O/CH<sub>3</sub>CN/TFA (50/50/0.1). ZipTip™ C-18 (Millipore, MA) pipette tips were  
172 used to analyse samples after tissue treatment by MALDI.

### 173 **2. Probe synthesis. General methods**

174 The FRET peptide sequences for MMP and thrombin were individually synthesized by standard Fmoc  
175 solid-phase peptide chemistry. Dyes and quenchers were coupled also by standard solid-phase methods.  
176 General procedures are as follows:

177 Manual peptide synthesis was performed on Aminomethyl-ChemMatrix™ resin using an Fmoc-Rink  
178 amide linker.

179 **Coupling of Fmoc-Rink amide linker:** The Fmoc-Rink-amide linker (0.54g, 1.0 eq) was dissolved in  
180 DMF (10 mL) and Oxyma (0.14g, 1.0 eq.) was added and the mixture was stirred for 10 min.  
181 Diisopropylcarbodiimide (DIC, 155  $\mu$ L, 1.0 eq.) was then added and the solution stirred for 1 min before  
182 adding it to Aminomethyl-ChemMatrix resin (1.0 g, 1.0 mmol/g). The resulting mixture was stirred at  
183 50°C for 45 min and washed with DMF (3x10 mL), DCM (3x10 mL) and MeOH (3x10 mL). Finally  
184 the resin was treated with Ac<sub>2</sub>O:Py:DMF (2:3:15) for 30 min in order to cap any remaining free amino  
185 groups and it was washed again with DMF (3x10 mL), DCM (3x10 mL) and MeOH (3x10 mL). Resin  
186 loading<sup>[6]</sup> was measured as ~0.58 mmol/g.

187 **Fmoc deprotection:** In general, to the resin pre-swollen in DCM was added 20% piperidine in DMF  
188 and shaken (2x10 min). The solution was drained and the resin washed with DMF (3x10 mL), DCM  
189 (3x10 mL) and MeOH (3x10 mL). In the cases were Fmoc deprotection was carried out on Cy5  
190 containing peptides, a solution of 2% DBU in DMF (2 x 10 min) was used.

191 **Aminoacid coupling:** A solution of the appropriate D- or L-amino acid (3.0 eq per amine) and Oxyma  
192 (3.0 eq) in DMF (0.1M) was stirred for 10 min. DIC (3.0 eq) was added and stirred for 1 min. The pre-  
193 activated mixture was then added to the resin pre-swollen in DCM and the reaction heated at 50<sup>o</sup>C for  
194 30 min. The solution was drained and washed with DMF (3x10 mL), DCM (3x10 mL) and MeOH  
195 (3x10 mL). Completion of coupling reactions were monitored by a Kaiser test or Chloranil test (when  
196 secondary amines are involved). The side chain protecting group used were Boc for Arginine,  
197 Tryptophan and Lysine. Fmoc-Lys(Dde)-OH was used as orthogonal reagent to introduce the dyes.

198 **Coupling of other carboxylic acids:** Coupling of {2-[2-(Fmoc-amino)ethoxy]ethoxy}acetic acid  
199 (PEG<sub>2</sub>), 5-Carboxyfluorescein (FAM), Fmoc-Lys(N<sub>3</sub>)-OH and Methyl Red-Lys-(4-pentynoyl)-OH was  
200 carried out following the procedure described for the aminoacid coupling.

201 **Dde deprotection:** (a) Dde deprotection in non Fmoc-containing peptides was carried out as follows:  
202 To the resin pre-swollen in DCM was added 2% hydrazine in DMF and shaken (5x10 min). The solution  
203 was drained and the resin washed with DMF (3x10 mL), DCM (3x10 mL) and MeOH (3x10 mL). (b)  
204 Selective Dde deprotection<sup>[7]</sup> in Fmoc-protected peptides was achieved with a solution containing  
205 Imidazole (1.35 mmol) and Hydroxylamine hydrochloride (1.80 mmol) in NMP (5 mL). After complete  
206 dissolution 5 volumes of this solution were diluted with 1 volume of CH<sub>2</sub>Cl<sub>2</sub> and the resin was treated  
207 with the final mixture for 3h at room temperature. The solution was drained and the resin washed with  
208 DMF (3x10 mL), DCM (3x10 mL) and MeOH (3x10 mL).

209 **Sulfo-Cy5 dye coupling:** A solution containing sulfo-Cy5 (1.0 eq per amine) in anhydrous DMF (10  
210 mg/mL) was activated with N,N,N',N'-Bis(tetramethylene)-O-(N-succinimidyl)uronium  
211 hexafluorophosphate (HSPyU) (1.0 eq) and DIPEA (3 eq) at 40<sup>o</sup>C for 1h. Once the activation was  
212 complete the solution was added to the resin together with DIPEA (3 eq) and shaken overnight. The  
213 solution was drained and the resin washed with DMF until colourless wash solution, then DCM (3x5  
214 mL) and MeOH (3x5 mL).

215 **QSY21 coupling:** N-terminal capping with QSY21-NHS ester (1.0 eq per amine) was carried out in  
216 anhydrous DMF (0.1M) containing DIPEA (3 eq) for 12 h. The solution was drained and the resin  
217 washed with DMF until the wash solution was colourless, then DCM (3x5 mL), MeOH (3x5 mL) and  
218 finally ether (3x5 mL).

219 **Methyl Red-NHS coupling:** Methyl Red-NHS ester (1 eq) coupling on the solid-phase was carried out  
220 in anhydrous DMF (0.1M) containing DIPEA (3 eq) for 12 h. The solution was drained and the resin  
221 washed with DMF until the wash solution was colourless, DCM (3x5 mL), MeOH (3x5 mL) and finally  
222 ether (3x5 mL).

223 **Cleavage and purification:** The resin, pre-swollen in DCM, was treated with a cleavage cocktail of  
224 TFA:triisopropylsilane(TIS):water (95:2.5:2.5) for 3h at room temperature. The reaction solution was  
225 drained and the resin washed with the cleavage cocktail. The combined solution was precipitated against  
226 cold ether, the peptide collected by centrifugation (x3) and purified by RP-HPLC on a C<sub>18</sub> semi-  
227 preparative column. The desired fractions containing the product were collected and lyophilized to  
228 afford the products that were characterized by MALDI TOF MS and analytical HPLC.

229

SYNTHESIS OF THROMBIN FRAGMENTS  
(FAM/MR) FOR DUALPROBE

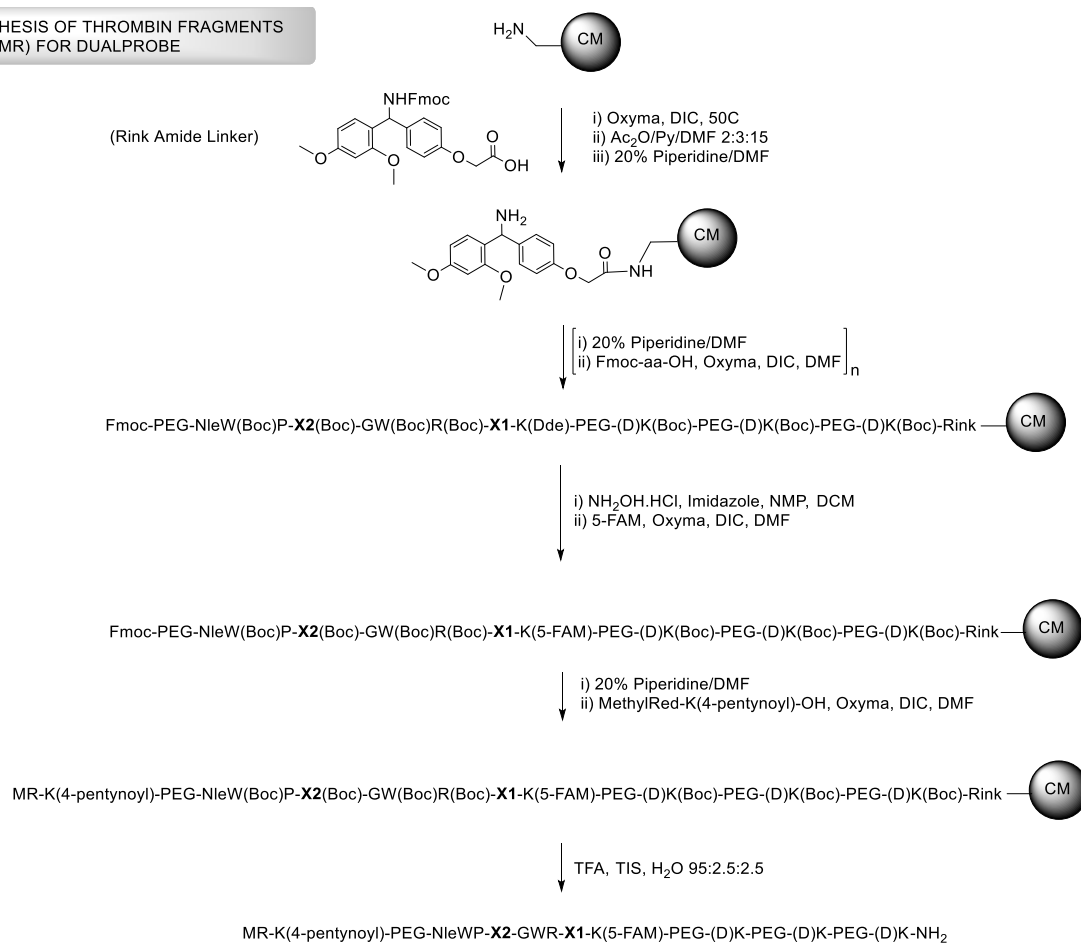

a: **X1** L **X2** R

b: **X1** (D)-L **X2** R

c: **X1** (D)-L **X2** (D)-R

a, b, c

230

231

232

233

**Scheme S2.** Synthesis of the FRET Thrombin peptides **a**, **b** and **c** with the FAM, MR and alkyne moieties.

234 **3. Thrombin probes containing the alkyne, FAM & Methyl Red groups. Characterization data**  
235 **(a, b, c)**

236 Thrombin substrates (Scheme S2) were built on the resin, cleaved and purified following the general  
237 procedures described above.

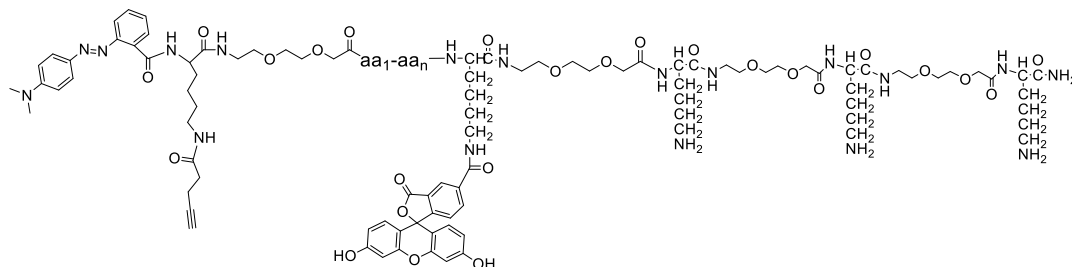

238  
239 Compound **a**: HPLC  $t_R = 4.0$  min, MALDI calc. for  $C_{148}H_{211}N_{34}O_{33}^+$   $[M+H]^+$ : 2994.520; found:  
240 2994.846.

241 Compound **b**: HPLC  $t_R = 4.2$  min, MALDI calc. for  $C_{148}H_{211}N_{34}O_{33}^+$   $[M+H]^+$ : 2994.520; found:  
242 2994.037.

243 Compound **c**: HPLC  $t_R = 4.1$  min, MALDI calc. for  $C_{148}H_{211}N_{34}O_{33}^+$   $[M+H]^+$ : 2994.520; found:  
244 2994.636.

245

246

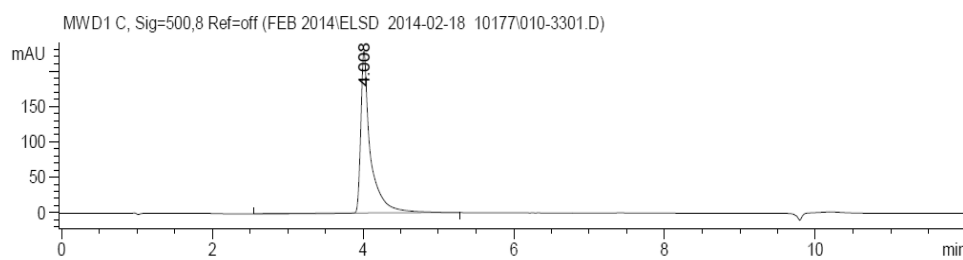

247

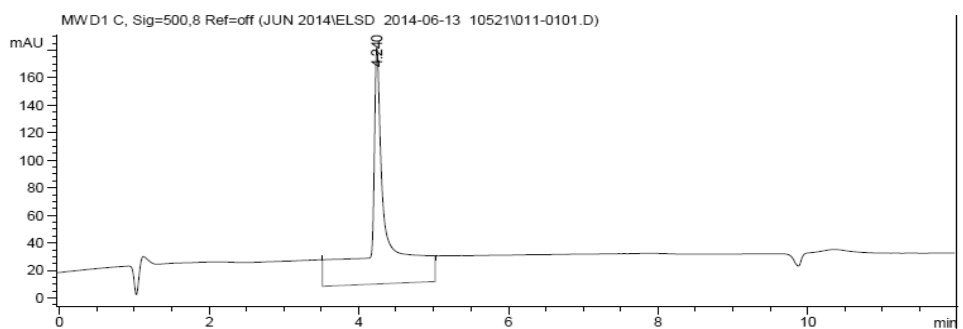

248

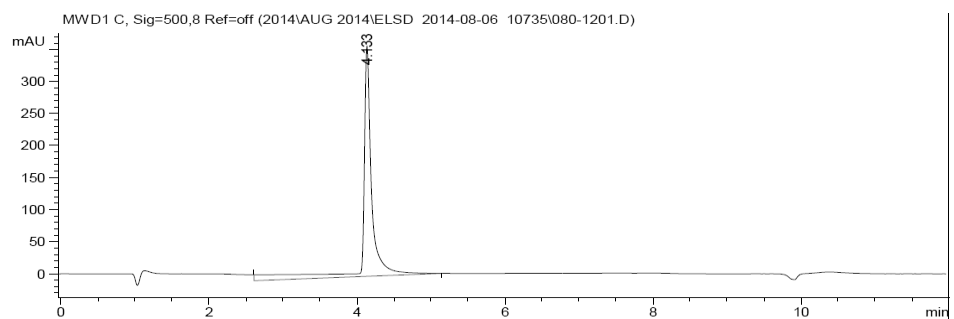

249

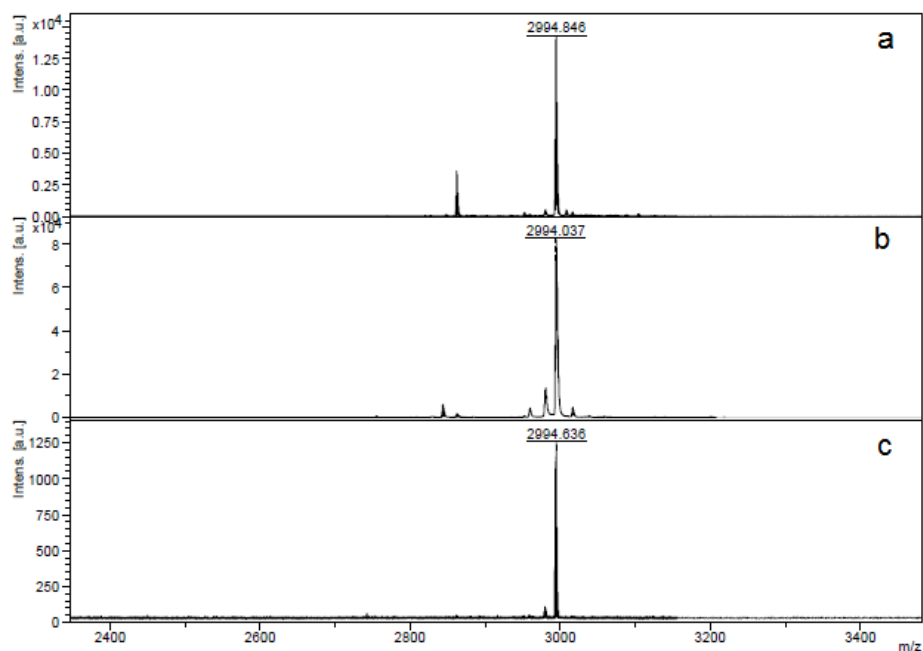

250

251 **Figure S8.** HPLC traces (detection at 500 nm) and MALDI TOF MS analysis for compounds **a** (upper),  
252 **b** (middle) and **c** (lower).

253

254 **4. Synthesis of Methyl Red-Lys-(N-4-pentynoyl)-OH**

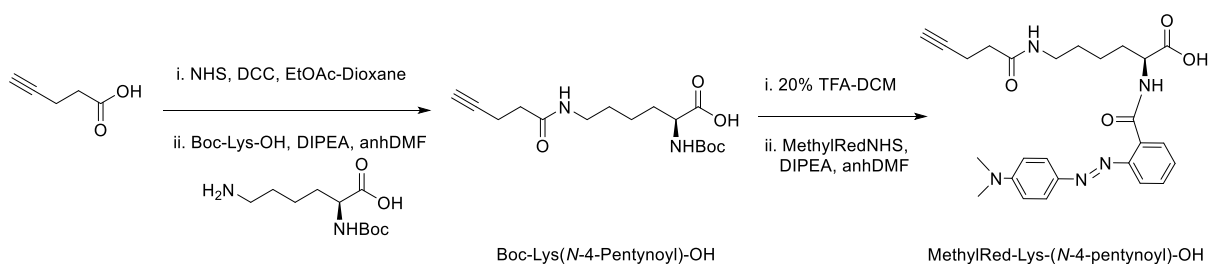

255  
256 **Scheme S3**

257  
258 **4-Pentynoic acid succinimidyl ester:** A solution of 4-pentynoic acid (0.5 g, 5.1 mmol) and N-  
259 Hydroxysuccinimide (0.59 g, 1 eq) in EtOAc-Dioxane (1:1, 50 mL) was stirred at 0°C and DCC (1.0 g,  
260 1 eq) was added allowing the mixture to reach room temperature and kept at these conditions for 12 h.  
261 The DCU formed was removed by filtration and the filtrate concentrated under vacuum. EtOAc (100  
262 mL) was added and washed with 5% NaHCO<sub>3</sub> (2x40 mL), water (40 mL) and brine (40 mL). After  
263 drying over anhydrous Na<sub>2</sub>SO<sub>4</sub> and concentrating *in vacuo* the target compound was recrystallized from  
264 DCM/Hexane to obtain a white solid that was used in the next step without further purification. **<sup>1</sup>H-**  
265 **NMR** (400 MHz, CDCl<sub>3</sub>) δ: 2.90 (t, 2H, *J* 7.0 Hz), 2.86 (s, 4H), 2.64 (td, 2H, *J* 7.0, 2.7 Hz), 2.07 (t,  
266 1H, *J* 2.7 Hz).

267  
268 **Boc-Lys[N-4-Pentynoyl]-OH:** Boc-Lys-OH (1.25 g, 5.1 mmol) was dissolved in anhydrous DMF (15  
269 mL), DIPEA (0.97 mL) was added followed by dropwise addition of a solution of 4-Pentynoic acid  
270 succinimidyl ester (5.1 mmol) in anhydrous DMF (8 mL). The reaction mixture was stirred for 3h. The  
271 solvent was removed under vacuum. To the crude was added HCl 1N (30 mL) and extracted with EtOAc  
272 (3x40 mL). The combined organic phases were dried over anhydrous Na<sub>2</sub>SO<sub>4</sub> and evaporated under  
273 vacuum to afford a white solid (1.36g, 82%). **MS** (ES)<sup>-</sup> *m/z* 325 [M-H]<sup>-</sup>, spectroscopic data identical to  
274 those reported previously in the literature.<sup>[8]</sup>

275  
276 **Methyl Red-Lys-(N-4-pentynoyl)-OH:** Boc-Lys[N-4-Pentynoyl]-OH (1.0 g, 3.0 mmol) was dissolved  
277 in 20% TFA in dichloromethane (10 mL) and the resulting mixture was stirred for 3h. The solvent was  
278 removed under vacuum and co-evaporated with toluene. The crude was dissolved in anhydrous DMF (5  
279 mL). Methyl Red-NHS ester<sup>[9]</sup> (1.1 g, 1 eq) and DIPEA (1.5 mL, 3eq) were added and the mixture  
280 stirred overnight. The solvent was removed under vacuum and the crude mixture dissolved in DCM  
281 (150 mL). HCl 1N (100 mL) was added and extracted again with DCM (2x100 mL). The combined  
282 organic phases were dried over anhydrous Na<sub>2</sub>SO<sub>4</sub>, evaporated under vacuum and purified by silica  
283 column chromatography (1:10 to 1:3 MeOH/EtOAc) to afford Methyl Red-Lys-(N-4-pentynoyl)-OH as  
284 a dark red solid (0.67 g, 47%). **m.p.** 153-155°C; **<sup>1</sup>H-NMR** (500 MHz, CD<sub>3</sub>OD) δ: 8.15 (dd, 1H, *J* 7.8,  
285 1.4 Hz), 7.98 (d, 2H, *J* 8.9 Hz), 7.78 (d, 1H, *J* 7.9 Hz), 7.57 (td, 1H, *J* 7.6, 1.3 Hz), 7.49 (t, 1H, *J* 7.6



286 Hz), 6.86 (d, 2H, *J* 9.1 Hz), 4.65 (t, 1H, *J* 5.2 Hz), 3.12 (s, 6H), 3.08 (t, 2H, *J* 6.1 Hz), 2.41-2.37 (m,  
287 2H), 2.30-2.26 (m, 2H), 2.24 (t, 1H, *J* 2.6 Hz), 2.02 (m, 1H), 1.87 (m, 1H), 1.49 (m, 2H), 1.43(m, 2H);  
288 <sup>13</sup>C-NMR (125 MHz, CD<sub>3</sub>OD) δ: 179.1, 173.8, 168.2, 155.0, 152.3, 144.8, 133.0, 131.6, 131.0, 130.2,  
289 127.5, 117.4, 112.8, 83.5, 70.4, 56.4, 40.4, 40.3, 36.1, 33.6, 30.1, 24.3, 15.8; MS (ES)<sup>+</sup> *m/z* 478 [M+H]<sup>+</sup>;  
290 HPLC *t<sub>R</sub>* 5.29 min.

291

292 **5. Synthesis of sulfo-Cy5:** 1,3,3-trimethyl-2-((1E,3Z,5E)-3-(5-carboxypyridin-2-yl)-5-(1,3,3-  
293 trimethyl-5-sulfonatoindolin-2-ylidene)penta-1,3-dien-1-yl)-3H-indol-1-ium-5-sulfonate.

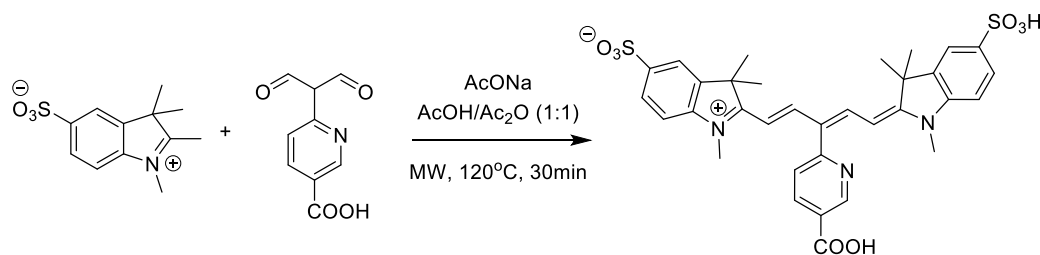

294

295 A solution of 1,2,3,3-tetramethyl-3H-indolium 5-sulfonate<sup>[10]</sup> (372 mg, 1.47 mmol, 2.2 eq), 6-(1-  
296 formyl-2-oxoethyl)-3-pyridinecarboxylic acid (129 mg, 0.67 mmol, 1.0 eq) and sodium acetate (346  
297 mg, 4.22 mmol, 6.3 eq) in acetic anhydride/acetic acid (1:1, 10 mL) was added to a microwave vial and  
298 heated at 120°C for 30 minutes. The mixture was cooled to room temperature. The solvents were  
299 removed under vacuum. Cold diethyl ether was added and the solid collected by centrifugation  
300 (3x15mL). The obtained solid was dried under vacuum; <sup>1</sup>H NMR (500 MHz, DMSO-*d*<sub>6</sub>) δ 9.19 (s, 1H),  
301 8.44 (d, *J* = 14.3 Hz, 2H), 8.31 (d, *J* = 7.8 Hz, 1H), 7.83 (s, 2H), 7.64 (d, *J* = 8.2 Hz, 2H), 7.42 (d, *J* =  
302 7.8 Hz, 1H), 7.30 (d, *J* = 8.3 Hz, 2H), 5.83 (d, *J* = 14.3 Hz, 2H), 3.35 (s, 6H), 1.77 (s, 12H); <sup>13</sup>C NMR  
303 (125 MHz, CD<sub>3</sub>OD) δ 172.1, 157.1, 154.7, 152.2, 145.4, 143.8, 142.6, 139.8, 134.1, 128.0, 126.8, 121.2,  
304 111.7, 102.7, 50.8, 31.7, 27.5; HR-MS (ESI): cal. C<sub>33</sub>H<sub>32</sub>O<sub>8</sub>N<sub>3</sub>S<sub>2</sub><sup>-</sup> 662.1636; found: 662.1651 (M)<sup>-</sup>

305

306 **6. MMP probes containing the azide, sulfo-Cy5 & QSY21 groups. Synthesis and Characterization**

307 **data**

308 QSY21-K(X<sub>0</sub>)-PEG-X<sub>1</sub>-X<sub>n</sub>-K(sulfo-Cy5)-PEG-(D)K-PEG-(D)K-PEG-(D)K-NH<sub>2</sub>

309 MMP substrates were built on the resin following the general procedure described above. Sulfo-Cy5  
310 and QSY21 labelling was carried out as follows:

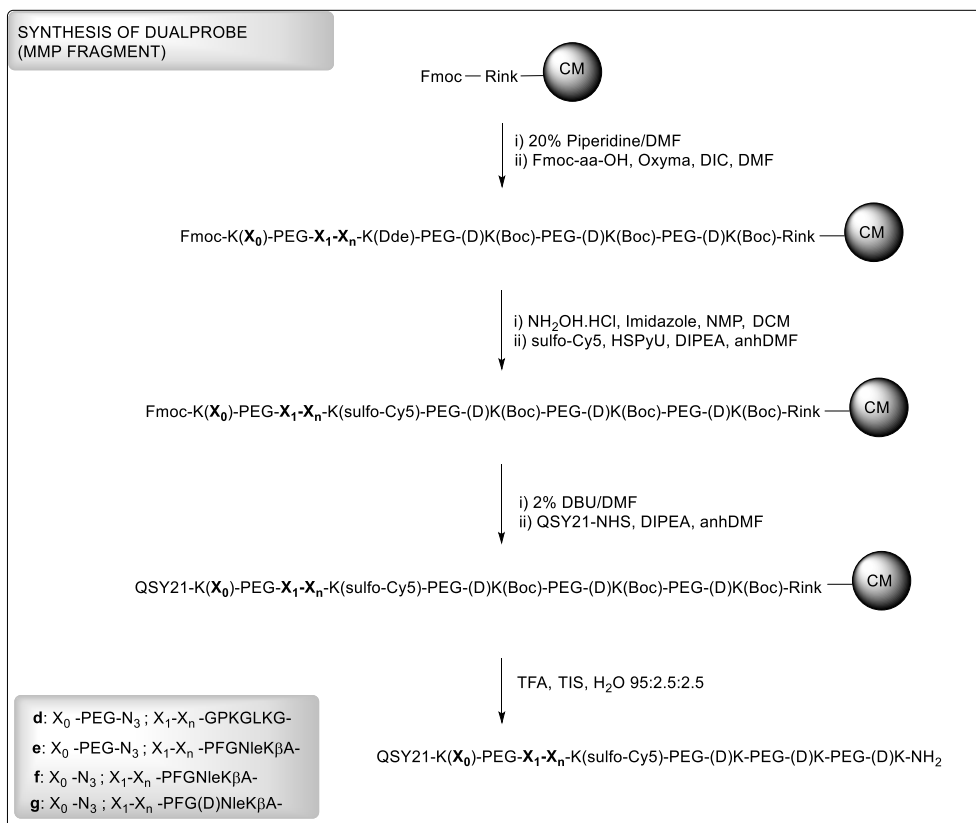

311

312

**Scheme S4.** Synthesis of FRET peptides **d**, **e**, **f**, **g** with sulfo-Cy5 and QSY21 attachment.

313

314 The protected peptide sequence built on the Chemmatrix resin [Fmoc-K(X<sub>0</sub>)-PEG-X<sub>1</sub>-X<sub>n</sub>-K(Dde)-  
315 [PEG-(D)K(Boc)]<sub>3</sub>-Rink-Resin] was selectively Dde deprotected according to the general procedure. A  
316 solution containing sulfo-Cy5 (1 eq) in anhydrous DMF (10 mg/mL) was activated with N,N,N',N'-  
317 bis(tetramethylene)-O-(N-succinimidyl)uronium hexafluorophosphate (HSPyU) (1 eq) and DIPEA (3  
318 eq) at 50<sup>0</sup>C for 1h. Once the activation was complete the solution was added to the resin together with  
319 DIPEA (3 eq) and shaken overnight. The solution was drained and the resin washed with DMF until  
320 colourless wash solution, DCM (3x5 mL) and MeOH (3x5 mL). N-terminal Fmoc deprotection was  
321 carried out using 2% DBU in DMF (2 x 10 min). In the last step to introduce the quencher, N-terminal  
322 capping with the QSY21-NHS ester (1 eq) was carried out in anydrous DMF containing DIPEA (3 eq)  
323 for 12 h. The solution was drained and the resin washed with DMF until the wash solution was  
324 colourless, DCM (3x5 mL), MeOH (3x5 mL) and finally ether (3x5 mL). Cleavage and purification  
325 were done according to the general procedure to obtain the following compounds:

326 **d:** HPLC t<sub>R</sub> = 3.9 min, MALDI calc. for C<sub>163</sub>H<sub>232</sub>N<sub>33</sub>O<sub>38</sub>S<sub>3</sub><sup>+</sup> [M]<sup>+</sup>: 3358.021; found: 3358.851.

327 **e:** HPLC t<sub>R</sub> = 4.0 min, MALDI calc. for C<sub>165</sub>H<sub>228</sub>N<sub>31</sub>O<sub>37</sub>S<sub>3</sub><sup>+</sup> [M]<sup>+</sup>: 3333.998; found: 3333.765.

328 **f:** HPLC t<sub>R</sub> = 4.5 min, MALDI calc. for C<sub>159</sub>H<sub>217</sub>N<sub>30</sub>O<sub>34</sub>S<sub>3</sub><sup>+</sup> [M]<sup>+</sup>: 3188.840; found: 3188.966.

329 **g:** HPLC t<sub>R</sub> = 4.4 min, MALDI calc. for C<sub>159</sub>H<sub>217</sub>N<sub>30</sub>O<sub>34</sub>S<sub>3</sub><sup>+</sup> [M]<sup>+</sup>: 3188.840; found: 3188.904.

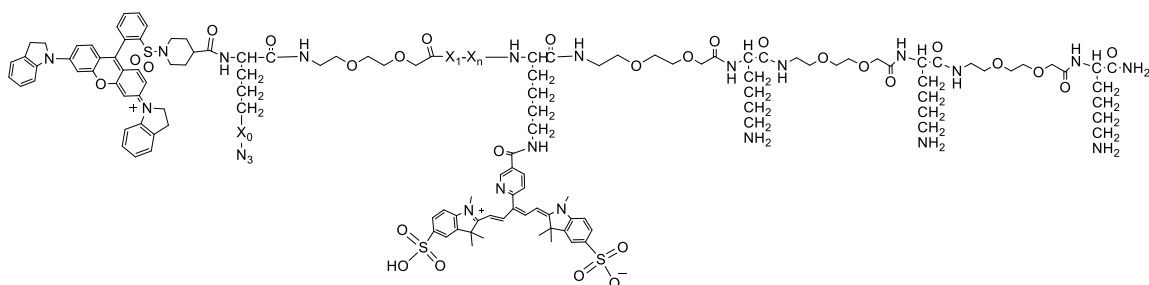

for **d**:  $X_1-X_n$ : -GPKGLKG- ;  $X_0$ : -CH<sub>2</sub>-NH-CO-CH<sub>2</sub>OCH<sub>2</sub>CH<sub>2</sub>OCH<sub>2</sub>CH<sub>2</sub>-  
 for **e**:  $X_1-X_n$ : -PFGNleKβA;  $X_0$ : -CH<sub>2</sub>-NH-CO-CH<sub>2</sub>OCH<sub>2</sub>CH<sub>2</sub>OCH<sub>2</sub>CH<sub>2</sub>-  
 for **f**:  $X_1-X_n$ : -PFGNleKβA;  $X_0$ : -CH<sub>2</sub>-  
 for **g**:  $X_1-X_n$ : -PFG(D)NleKβA;  $X_0$ : -CH<sub>2</sub>-

330

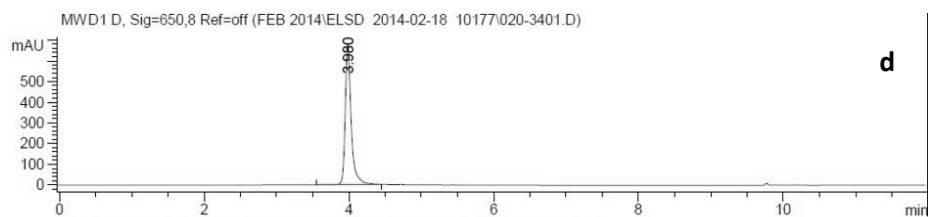

**d**

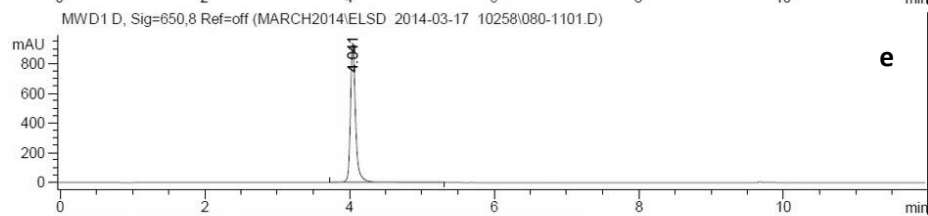

**e**

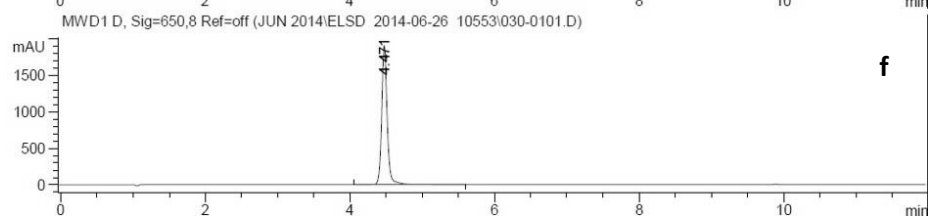

**f**

331

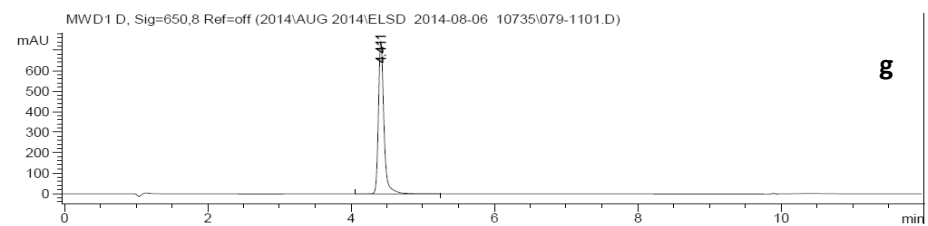

**g**

332

333

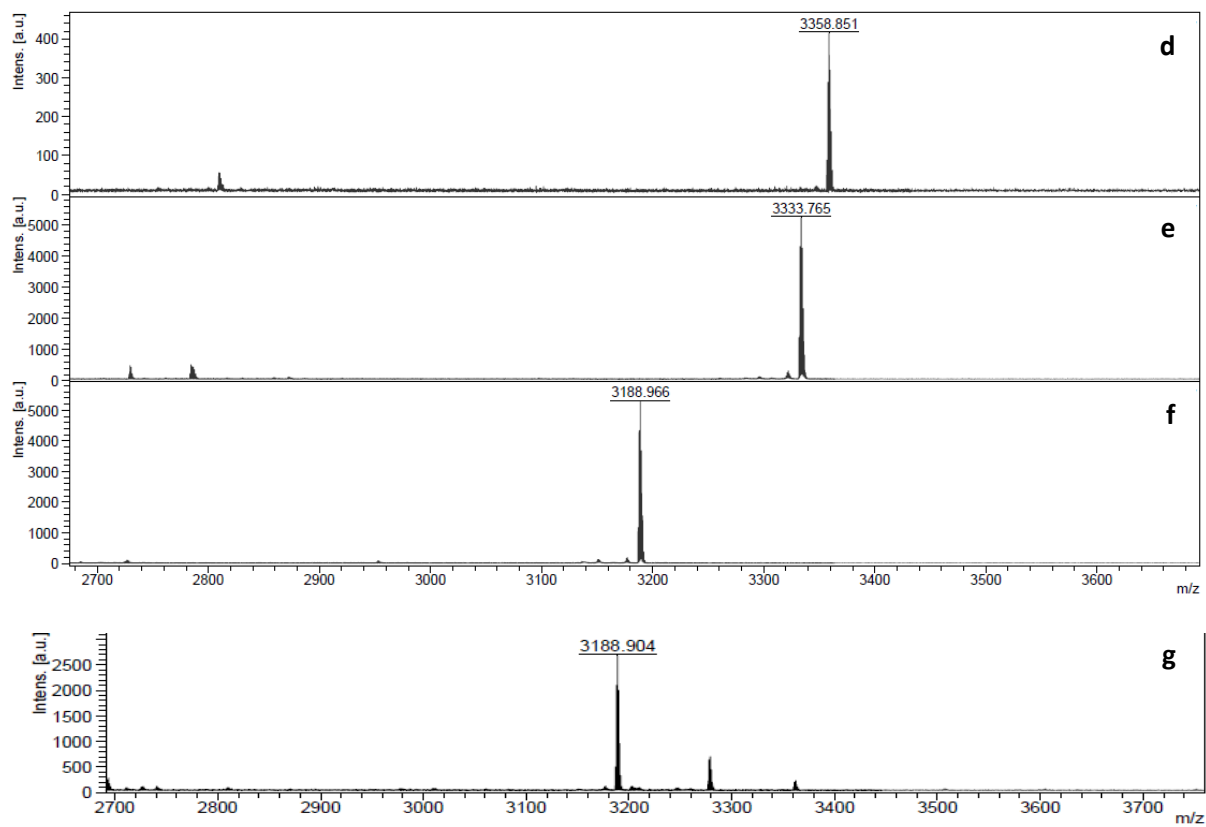

334

335

336 **Figure S9.** HPLC traces and MALDI TOF MS spectra for compounds **d**, **e**, **f**, **g**.

337

338

339 **7. Dual-probes. Synthesis and Characterization data**

340

341

**Table S1**

| Compound | Thrombin fragment | MMP fragment |
|----------|-------------------|--------------|
| 1        | a                 | d            |
| 2        | a                 | e            |
| 3        | b                 | f            |
| 4*       | c                 | f            |
| 5*       | b                 | g            |

\* Control probes

SYNTHESIS OF DUAL-PROBE:  
Click reaction

QSY21-K(N<sub>3</sub>)-PEG-PFGNleKβAK(sulfo-Cy5)-PEG-(D)K-PEG-(D)K-PEG-(D)K-NH<sub>2</sub>

+

Methyl Red-K(4-pentynoyl)-PEG-NleWPRGWR(D)LK(5-FAM)-PEG-(D)K-PEG-(D)K-PEG-(D)K-NH<sub>2</sub>

↓  
CuSO<sub>4</sub> /Ascorbate  
THPTA  
Aminoguanidine  
H<sub>2</sub>O

QSY21-K-PEG-PFGNleKβAK(sulfo-Cy5)-PEG-(D)K-PEG-(D)K-PEG-(D)K-NH<sub>2</sub>

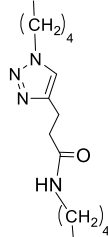

Methyl Red-K-PEG-NleWPRGWR(D)LK(5-FAM)-PEG-(D)K-PEG-(D)K-PEG-(D)K-NH<sub>2</sub>

342

343 **Scheme S5. Synthesis of dual-probes exemplified for compound 3**

344 General procedure for the fabrication of the dual-probes by Cu-catalysed azide-alkyne cycloaddition  
 345 chemistry. Optimized conditions for the click reaction were used.<sup>[11]</sup> In an eppendorf tube the following  
 346 aqueous reagents were mixed: alkyne-peptide fragment (**a**, **b** or **c**) (50 μL, 1mM), azide-peptide  
 347 fragment (**d**, **e**, **f** or **g**) (50 μL, 1mM), premixed CuSO<sub>4</sub> and THPTA (40 μL CuSO<sub>4</sub> 20mM and 80 μL  
 348 THPTA 50 mM), aminoguanidine hydrochloride (250 μL, 100 mM) and finally sodium ascorbate (250  
 349 μL, 100 mM). The reaction was allowed to proceed at 30°C for 5h, the reaction mixture was lyophilised  
 350 and purified by HPLC to give the final dual-probes, which were characterized by MALDI and analytical  
 351 HPLC:

352 **1:** HPLC t<sub>R</sub> = 4.21 min, MALDI calc. for C<sub>311</sub>H<sub>442</sub>N<sub>67</sub>O<sub>71</sub>S<sub>3</sub><sup>+</sup> [M<sup>+</sup>]: 6351.534; found: 6351.492.

353 **2:** HPLC t<sub>R</sub> = 4.24 min, MALDI calc. for C<sub>313</sub>H<sub>438</sub>N<sub>65</sub>O<sub>70</sub>S<sub>3</sub><sup>+</sup> [M<sup>+</sup>]: 6327.511; found: 6327.699.

354 **3:** HPLC  $t_R = 4.15$  min, MALDI calc. for  $C_{307}H_{427}N_{64}O_{67}S_3^+$   $[M^+]$ : 6182.353; found: 6182.343.

355 **4:** HPLC  $t_R = 5.2$  min, MALDI calc. for  $C_{307}H_{427}N_{64}O_{67}S_3^+$   $[M^+]$ : 6182.353; found: 6182.489.

356 **5:** HPLC  $t_R = 5.3$  min, MALDI calc. for  $C_{307}H_{427}N_{64}O_{67}S_3^+$   $[M^+]$ : 6182.353; found: 6182.260.

357

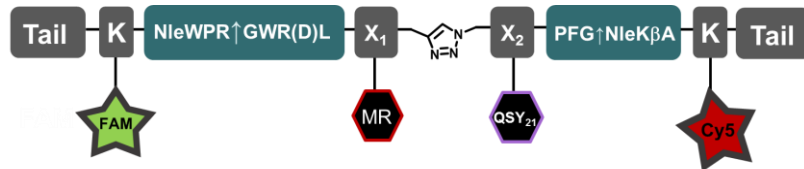

358

359

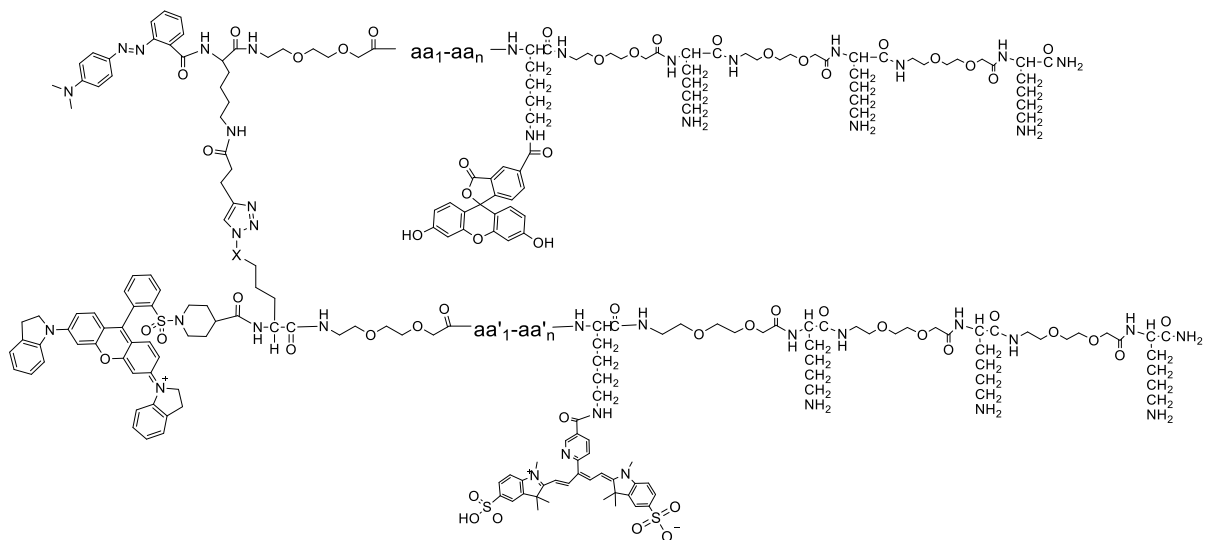

for **1**: -aa<sub>1</sub>-aa<sub>n</sub>-: -NleWPRGWRL-; -aa'<sub>1</sub>aa'<sub>n</sub>-: -GPKGLKG-; X: -CH<sub>2</sub>-NH-CO-CH<sub>2</sub>OCH<sub>2</sub>CH<sub>2</sub>OCH<sub>2</sub>CH<sub>2</sub>-  
for **2**: -aa<sub>1</sub>-aa<sub>n</sub>-: -NleWPRGWRL-; -aa'<sub>1</sub>aa'<sub>n</sub>-: -PFGNleKβA- ; X: -CH<sub>2</sub>-NH-CO-CH<sub>2</sub>OCH<sub>2</sub>CH<sub>2</sub>OCH<sub>2</sub>CH<sub>2</sub>-  
for **3**: -aa<sub>1</sub>-aa<sub>n</sub>-: -NleWPRGWR(D)L-; -aa'<sub>1</sub>aa'<sub>n</sub>-: -PFGNleKβA- ; X: -CH<sub>2</sub>-  
for **4**: -aa<sub>1</sub>-aa<sub>n</sub>-: -NleWP(D)RGWR(D)L-; -aa'<sub>1</sub>aa'<sub>n</sub>-: -PFGNleKβA- ; X: -CH<sub>2</sub>-  
for **5**: -aa<sub>1</sub>-aa<sub>n</sub>-: -NleWPRGWR(D)L-; -aa'<sub>1</sub>aa'<sub>n</sub>-: -PFG(D)NleKβA- ; X: -CH<sub>2</sub>-

360

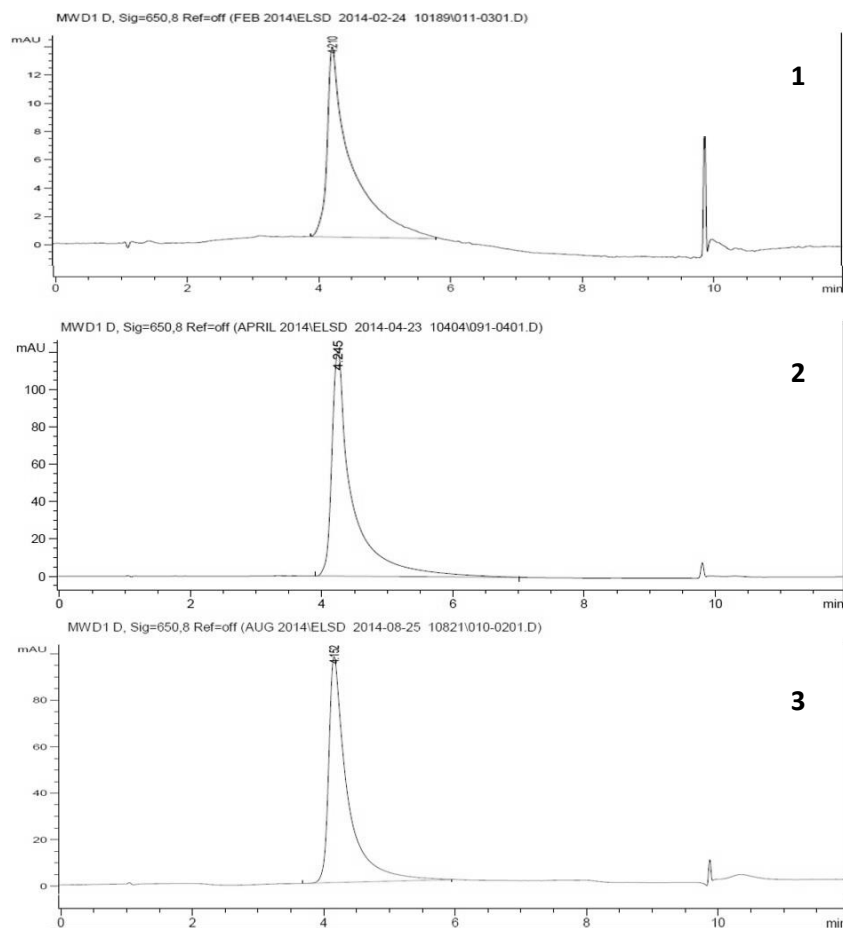

361

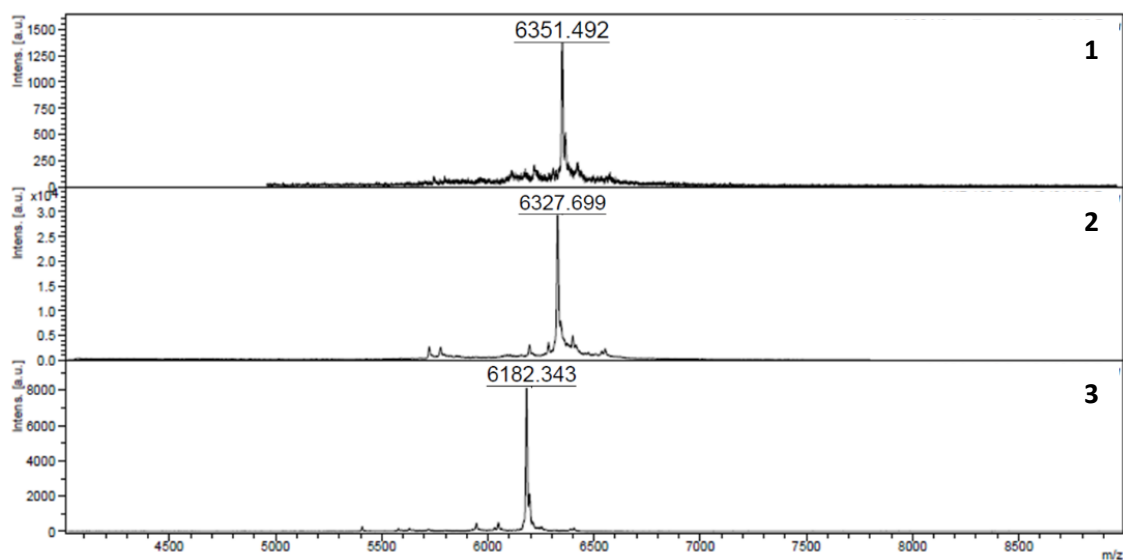

362

363 **Figure S10.** Structure, HPLC traces and MALDI TOF MS spectra for dual-probes 1-3

364

365

366

367 **Control compounds 4 and 5:**

368

369 Control compounds were synthesised using D-Arg in the Thrombin cleavage site for **4** or D-Nle in the  
370 MMP cleavage site for **5**

371

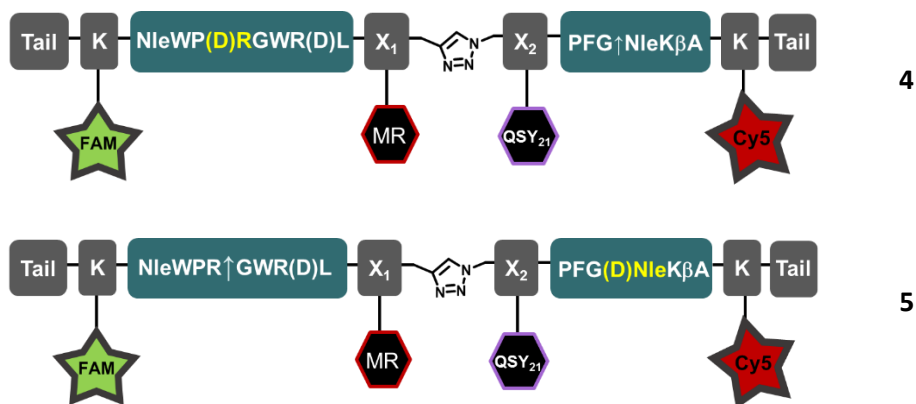

**Figure S11.** Structure of Control probes **4** and **5**

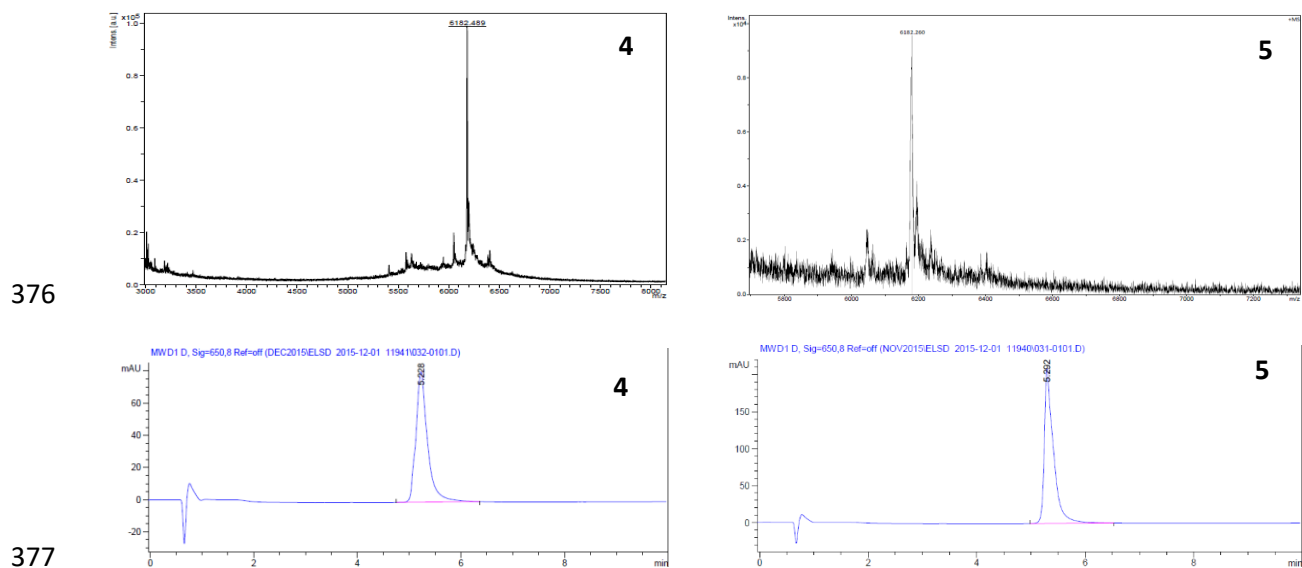

**Figure S12.** HPLC traces and MALDI TOF MS spectra for compounds **4** and **5**

379



380

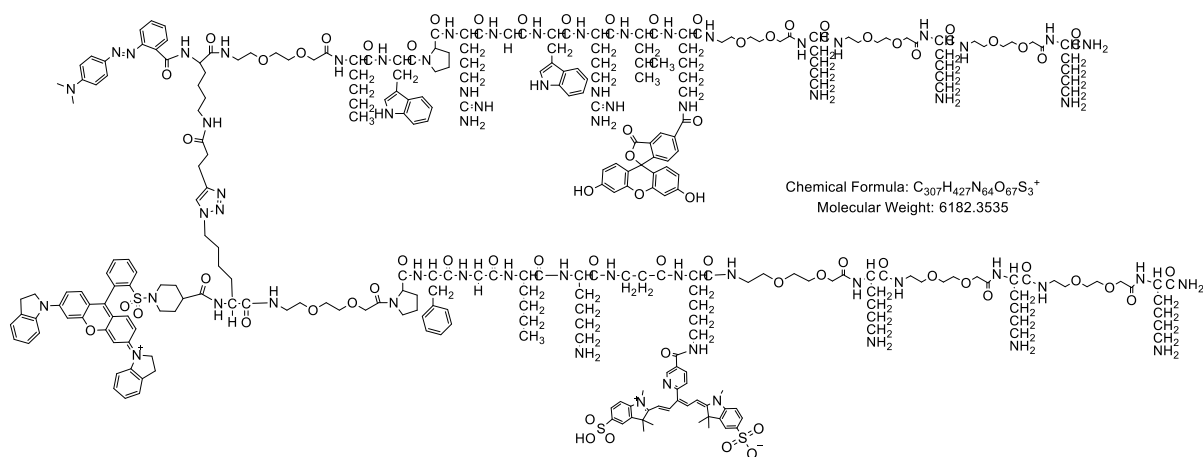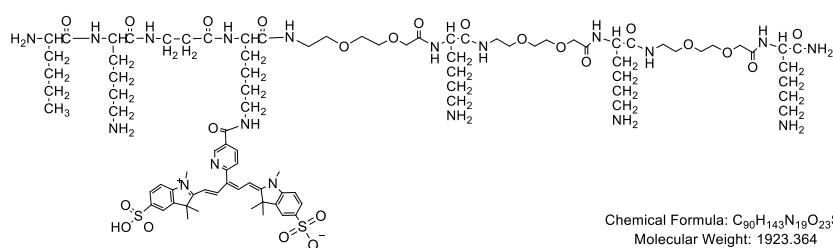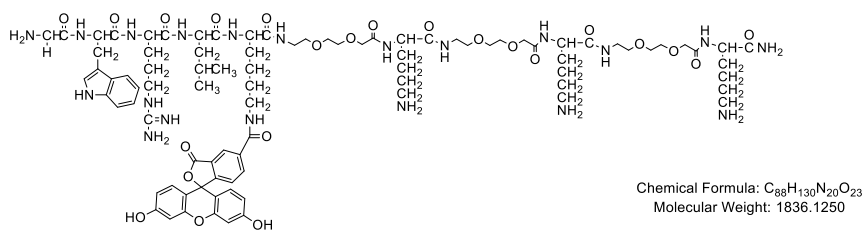

381

382

383

384

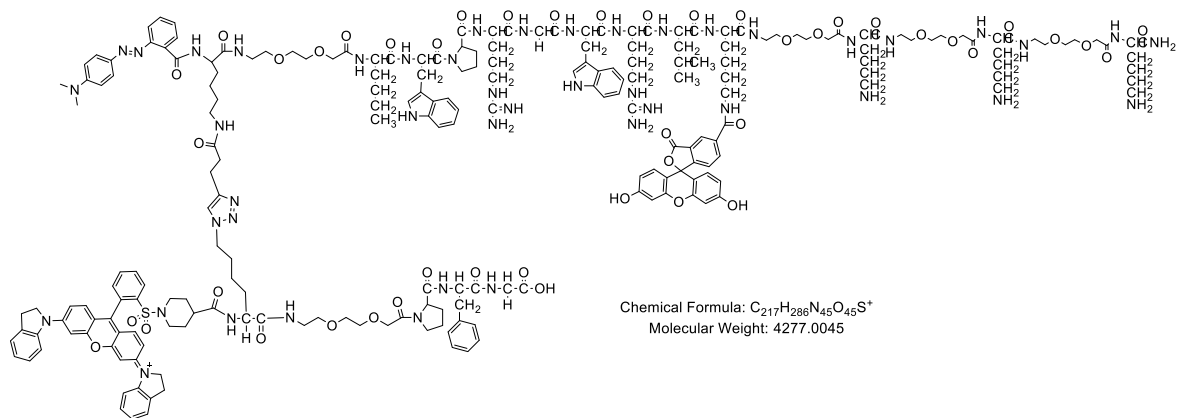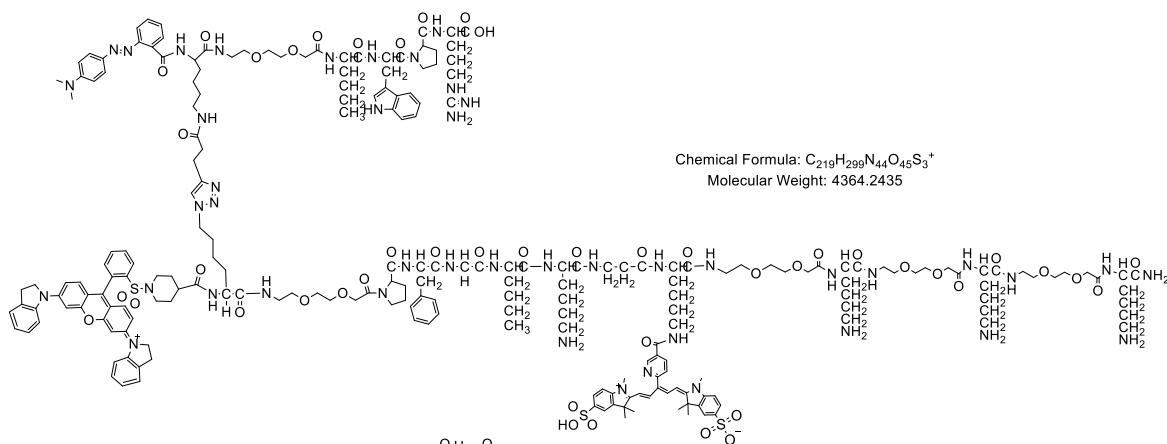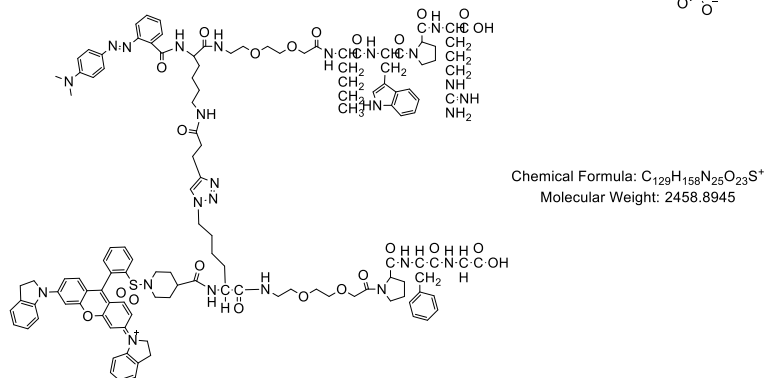

385

386 **Figure S13.** Chemical structures of the fragments detected by MALDI-TOF MS after enzymatic  
387 treatment of compound **3**.

388

**Table S2**

|          | COMPOUND                                                                                                                                                                                                                                           | m/z <sub>calc</sub><br>(Da)* | MALDI<br>m/z (Da) | HPLC<br>t <sub>R</sub><br>(min) |
|----------|----------------------------------------------------------------------------------------------------------------------------------------------------------------------------------------------------------------------------------------------------|------------------------------|-------------------|---------------------------------|
| <b>a</b> | MR-K(Alkyne)-PEG <sub>2</sub> -NleWPRGWRL-K(FAM)-(PEG <sub>2</sub> -<br>(D)K-) <sub>3</sub> -NH <sub>2</sub>                                                                                                                                       | 2994.520                     | 2994.846          | 4.008                           |
| <b>b</b> | MR-K(Alkyne)-PEG <sub>2</sub> -NleWPRGWR(D)L-K(5-FAM)-<br>(PEG <sub>2</sub> - <b>(D)</b> K-) <sub>3</sub> -NH <sub>2</sub>                                                                                                                         | 2994.520                     | 2994.037          | 4.240                           |
| <b>c</b> | MR-K(Alkyne)-PEG <sub>2</sub> -NleWP(D)RGWR(D)L-K(5-FAM)-<br>(PEG <sub>2</sub> - <b>(D)</b> K-) <sub>3</sub> -NH <sub>2</sub>                                                                                                                      | 2994.520                     | 2994.636          | 4.133                           |
| <b>d</b> | QSY21-K(PEG <sub>2</sub> -N <sub>3</sub> )-PEG <sub>2</sub> -GPKGLKG-K(Cy5)-(PEG <sub>2</sub> -<br>(D)K-) <sub>3</sub> -NH <sub>2</sub>                                                                                                            | 3358.021                     | 3358.851          | 3.980                           |
| <b>e</b> | QSY21-K(PEG-N <sub>3</sub> )-PEG <sub>2</sub> -PFGNleKβA-K(Cy5)-(PEG <sub>2</sub> -<br>(D)K-) <sub>3</sub> -NH <sub>2</sub>                                                                                                                        | 3333.998                     | 3333.765          | 4.041                           |
| <b>f</b> | QSY21-K(N <sub>3</sub> )-PEG <sub>2</sub> -PFGNleKβA-K(Cy5)-(PEG <sub>2</sub> - <b>(D)</b> K-) <sub>3</sub> -<br>NH <sub>2</sub>                                                                                                                   | 3188.840                     | 3188.966          | 4.471                           |
| <b>g</b> | QSY21-K(N <sub>3</sub> )-PEG <sub>2</sub> -PFG(D)NleKβA-K(Cy5)-(PEG <sub>2</sub> -<br>(D)K-) <sub>3</sub> -NH <sub>2</sub>                                                                                                                         | 3188.840                     | 3188.904          | 4.411                           |
| <b>1</b> | QSY21-K(PEG <sub>2</sub> -<br> <br>triazole<br> <br>MR-K-PEG <sub>2</sub> -NleWPRGWRLK(FAM)-(PEG <sub>2</sub> - <b>(D)</b> K-) <sub>3</sub> -NH <sub>2</sub>                                                                                       | 6351.534                     | 6351.492          | 4.210                           |
| <b>2</b> | QSY21-K(PEG <sub>2</sub> -<br> <br>triazole<br> <br>MR-K-PEG <sub>2</sub> -NleWPRGWRLK(FAM)-(PEG <sub>2</sub> - <b>(D)</b> K-) <sub>3</sub> -NH <sub>2</sub>                                                                                       | 6327.511                     | 6327.699          | 4.245                           |
| <b>3</b> | QSY21-K-PEG <sub>2</sub> -PFGNleKβA-K(Cy5)-(PEG <sub>2</sub> - <b>(D)</b> K-) <sub>3</sub> -NH <sub>2</sub><br> <br>triazole<br> <br>MR-K-PEG <sub>2</sub> -NleWPRGWR(D)LK(5-FAM)-(PEG <sub>2</sub> - <b>(D)</b> K-) <sub>3</sub> -NH <sub>2</sub> | 6182.353                     | 6182.343          | 4.152                           |

|          |                                                                                                                          |          |          |       |
|----------|--------------------------------------------------------------------------------------------------------------------------|----------|----------|-------|
| <b>4</b> | QSY21-K-PEG <sub>2</sub> -PFGNleKβA-K(Cy5)-(PEG <sub>2</sub> -(D)K-) <sub>3</sub> -NH <sub>2</sub>                       | 6182.353 | 6182.489 | 5.228 |
|          | triazole<br> <br>MR-K-PEG <sub>2</sub> -NleWP(D)RGWR(D)LK(5-FAM)-(PEG <sub>2</sub> -(D)K-) <sub>3</sub> -NH <sub>2</sub> |          |          |       |
| <b>5</b> | QSY21-K-PEG <sub>2</sub> -PFG(D)NleKβA-K(Cy5)-(PEG <sub>2</sub> -(D)K-) <sub>3</sub> -NH <sub>2</sub>                    | 6182.353 | 6182.260 | 5.292 |
|          | triazole<br> <br>MR-K-PEG <sub>2</sub> -NleWPRGWR(D)LK(5-FAM)-(PEG <sub>2</sub> -(D)K-) <sub>3</sub> -NH <sub>2</sub>    |          |          |       |

391 \* m/z calculated for [M+H]<sup>+</sup> or [M]<sup>+</sup>

392

393

394 **Biological Materials and Methods:**

395 **Murine LPS model:** Lipopolysaccharide (LPS) lung injury and lavage collection and processing was  
396 performed as previously described,<sup>[14]</sup> however lavage was collected 24h post LPS administration  
397 (*Escherichia coli* serotype O111:B4; Sigma-Aldrich). All mice were female 8-10 week old CD1. Three  
398 were dosed with LPS, three were naïve controls. Presence of active MMP in the lavage fluid was  
399 confirmed by zymography (Novex® 10% Zymogram (Gelatin) Protein Gels, 1.0 mm, 15 well, Thermo  
400 Scientific). Gels were run at 150 kV 4 °C, renatured 4 °C (Novex™ Zymogram Renaturing Buffer  
401 (10X), Thermo Scientific) 90 min, followed by developing (Novex™ Zymogram Developing  
402 Buffer (10X) buffer, Thermo Scientific) overnight at 37 °C (with 50 µM Marimastat when  
403 appropriate). Gels were stained with Simply Blue Safe Stain (Thermo Scientific) according to  
404 manufacturer's instructions. PRP was harvested from whole murine blood as described above for human  
405 PRP.

406 Plate reader assays were performed as described in the main text, with the MMP buffer replaced with  
407 lavage fluid or PRP. All experiments were carried-out in duplicate. Data was normalised by background  
408 subtraction of intrinsic fluorescence.

409

410 **PEPTIDE SEQUENCE OPTIMIZATION OF THE MMP-2/9/13 SUBSTRATE**411 To generate molecular probe sequences to optimally/specifically measure MMP activity the probes  
412 were synthesised as shown below:

413

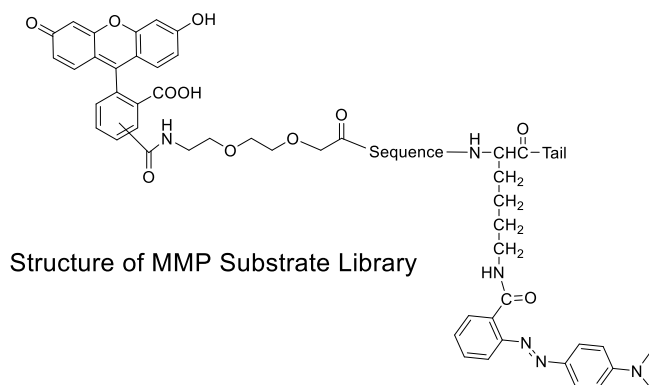

414

| Seq ID No. | Generation 1<br>*-NH <sub>2</sub> | Notes               | Generation 2<br>*-(PEG <sub>2</sub> ) <sub>2</sub> -NH <sub>2</sub> | Generation 3<br>*-K-K-(PEG <sub>2</sub> ) <sub>2</sub> -NH <sub>2</sub> | Generation 4<br>*-[PEG <sub>2</sub> -(D)K] <sub>3</sub> -NH <sub>2</sub> |
|------------|-----------------------------------|---------------------|---------------------------------------------------------------------|-------------------------------------------------------------------------|--------------------------------------------------------------------------|
| 1          | G-P-K-G-L-K-G                     | —————→              | 1-G2                                                                | —————→                                                                  | 1-G3                                                                     |
| 2          | G-P-K-G-(D)L-K-G                  | Control sequence    |                                                                     |                                                                         |                                                                          |
| 3          | G-P-K-G-I-K-G                     | Cleaved by elastase |                                                                     |                                                                         |                                                                          |
| 4          | G-P-K-G-Nle-K-G                   |                     |                                                                     |                                                                         |                                                                          |
| 5          | P-F-G-M-K-βA                      |                     |                                                                     |                                                                         |                                                                          |
| 6          | P-F-G-(D)M-K-βA                   | Control sequence    |                                                                     |                                                                         |                                                                          |
| 7          | P-F-G-L-K-βA                      |                     |                                                                     |                                                                         |                                                                          |
| 8          | P-F-G-I-K-βA                      | Cleaved by elastase |                                                                     |                                                                         |                                                                          |
| 9          | P-F-G-Nle-K-βA                    | —————→              | 9-G2                                                                | —————→                                                                  | 9-G3                                                                     |
| 10         | P-Cha-G-M-F-G                     |                     |                                                                     |                                                                         |                                                                          |
| 11         | P-Cha-G-M-W-G                     |                     |                                                                     |                                                                         |                                                                          |
| 12         | P-Cha-G-M-Y(Me)-G                 |                     |                                                                     |                                                                         |                                                                          |
| 13         | P-Cha-G-M-Y-G                     |                     |                                                                     |                                                                         |                                                                          |
| 14         | P-Cha-G-M-K-βA-G                  |                     |                                                                     |                                                                         |                                                                          |
| 15         | P-Cha-G-M-H-G                     |                     |                                                                     |                                                                         |                                                                          |
| 16         | P-Cha-G-M-K-G                     |                     |                                                                     |                                                                         |                                                                          |

415

416 **Table S3.** Library of the FRET compounds generated/screened and iterated from the first to fourth  
417 generation. The MMP cleavage site is indicated by italics. \*Structure of the tail for each generation of  
418 probe.

419

420 The initial library of FRET activatable probes (Table S3 - Generation 1 probes) contained the  
421 fluorophore 5,6-Carboxyfluorescein and the quencher Methyl Red separated by a peptide sequence  
422 acting as the substrate for the target enzyme. Sequence 1 was selected according to a previous proteomic  
423 study using iTRAQ-TAILS.<sup>[15]</sup> Other sequences were designed and included in the initial G1 screen  
424 after analysis of commercial and other reported MMP substrates.425 The FRET peptides were synthesized by manual standard solid-phase Fmoc chemistry and evaluated as  
426 MMP substrates. The response towards MMP and the specific inhibition with the MMP inhibitor

427 Marimastat was measured (Fig S14), with site specific cleavage confirmed for all the sequences (Table  
428 S3) by MALDI-TOF MS analysis. The others MMPs tested shared the same cleavage site.

429 Specific inhibition of fluorescence signal using Marimastat (a pan-MMP inhibitor) was successful for  
430 all the probes tested. Control probes (sequence 2 and 6) containing D-aminoacids in the cleavage site  
431 showed no increase in fluorescence and no cleavage was detected by MALDI TOF MS.

432 Selectivity was determined by analysis of the change in fluorescence over background upon the addition  
433 of different proteases (MMP -2, -9, -12, -13, Neutrophil elastase and Thrombin). In order to choose the  
434 best probes for *in vivo or ex vivo use* a number of additional parameters were evaluated which included  
435 fluorescence increase in the presence of other related inflammatory proteases such as Thrombin and  
436 human Neutrophil Elastase (NE) (Fig S15 and Table S4).

437  
438 Results from the generation 1 experiments indicated that sequences 3 and 8 were cleaved by NE, clearly  
439 a major issue for a probe for use with tissue. MALDI TOF MS analysis performed after enzymatic  
440 treatment confirmed the probes were being cleaved by NE at a different site to those found for the  
441 MMPs. NE cleaved probe 3-G1 at -G-P-K-G-I↑K-G- and probe 8-G1 at P-F-G-I↑K-βA (Fig S16-S17).  
442 The other sequences remained intact and Thrombin did not cleave any of the sequences.

443  
444 The probes containing Methionine in the cleavage site (sequences 5 and 10-16), which were selectively  
445 cleaved by MMPs were deprioritised due to the anticipated stability issues that thioether oxidation can  
446 cause. Assays with with human tissue homogenate confirmed specific cleavage and inhibition with  
447 Marimastat only for sequence 1 (-G-P-K-G↑L-K-G-) and sequence 9 (-P-F-G↑Nle-K-BA-) (Fig S20-  
448 S21). All these assays were conducted using standard FRET peptides prior to lead optimisation for  
449 incorporation into the dual-probes.

450

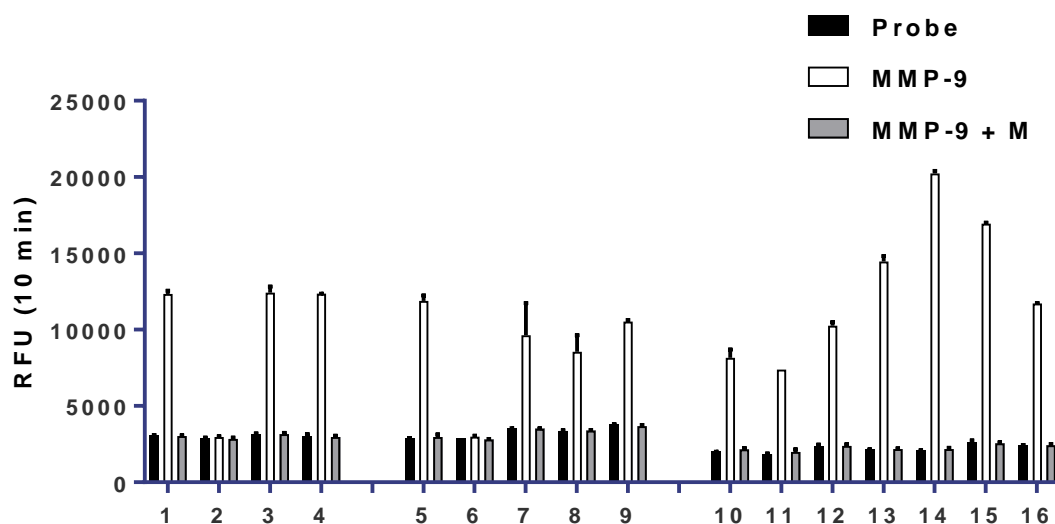

451

452 **Figure S14.** Probe fluorescence (ex 485nm/em 528nm) was measured for all Generation 1  
453 compounds (10μM) with MMP-9 (30nM) in the absence or presence of Marimastat (M) (20μM).

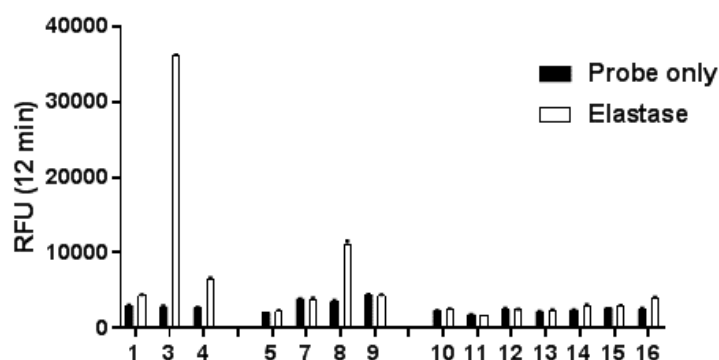

454

455 **Figure S15.** Probe fluorescence (ex 485nm/em 528nm) as measured after 12 min for the Generation 1  
 456 compounds (10 $\mu$ M) in the absence or presence of Elastase (30nM).

457

| SEQ ID NO. | Probe sequence                                  | Inflammatory mediators |                    |                     |                     |                      |                        |             |
|------------|-------------------------------------------------|------------------------|--------------------|---------------------|---------------------|----------------------|------------------------|-------------|
|            |                                                 | MMP-9<br>(39.0kDa)     | MMP-2<br>(20.3kDa) | MMP-12<br>(20.3kDa) | MMP-13<br>(20.4kDa) | Neutrophil<br>lysate | Neutrophil<br>elastase | Thrombin    |
| <b>1</b>   | <b>-G-P-K-G-L-K-G-</b>                          | <b>3.50</b>            | <b>1.98</b>        | <b>2.34</b>         | <b>9.30</b>         | <b>1.93</b>          | <b>1.30</b>            | <b>1.31</b> |
| <b>3</b>   | -G-P-K-G- <i>Ile</i> -K-G-                      | 4.22                   | 2.10               | 1.54                | 9.33                | 13.49                | 11.97                  | 1.37        |
| <b>4</b>   | -G-P-K-G- <i>Nle</i> -K-G-                      | 4.53                   | 2.70               | 1.46                | 11.75               | 3.06                 | 1.97                   | 1.48        |
| <b>5</b>   | -P-F-G- <i>M</i> -K- $\beta$ A-                 | 5.21                   | 3.11               | 1.88                | 13.57               | 1.07                 | 1.06                   | 0.99        |
| <b>7</b>   | -P-F-G- <i>L</i> -K- $\beta$ A-                 | 2.50                   | 1.87               | 3.03                | 6.41                | 0.99                 | 0.10                   | 0.89        |
| <b>8</b>   | -P-F-G- <i>Ile</i> -K- $\beta$ A-               | 2.29                   | 1.59               | 1.65                | 5.05                | 3.29                 | 2.25                   | 0.96        |
| <b>9</b>   | <b>-P-F-G-<i>Nle</i>-K-<math>\beta</math>A-</b> | <b>2.02</b>            | <b>1.88</b>        | <b>1.53</b>         | <b>5.27</b>         | <b>0.96</b>          | <b>0.99</b>            | <b>0.96</b> |
| <b>10</b>  | -P-Cha-G-M- <i>F</i> -G-                        | 5.89                   | 3.27               | 2.45                | 11.75               | 2.02                 | 1.07                   | 0.94        |
| <b>11</b>  | -P-Cha-G-M- <i>W</i> -G-                        | 5.07                   | 2.59               | 2.59                | 6.5                 | 0.84                 | 1.04                   | 1.05        |
| <b>12</b>  | -P-Cha-G-M- <i>Y(Me)</i> -G-                    | 4.94                   | 2.54               | 2.15                | 10.04               | 0.75                 | 1.00                   | 0.97        |
| <b>13</b>  | -P-Cha-G-M- <i>Y</i> -G-                        | 6.90                   | 4.07               | 2.87                | 11.26               | 1.89                 | 1.08                   | 1.04        |
| <b>14</b>  | -P-Cha-G-M- <i>K-<math>\beta</math>A</i> -G-    | 9.61                   | 5.22               | 3.21                | 15.9                | 1.40                 | 1.19                   | 1.00        |
| <b>15</b>  | -P-Cha-G-M- <i>H</i> -G-                        | 7.53                   | 4.01               | 3.05                | 12.93               | 1.27                 | 1.08                   | 0.97        |
| <b>16</b>  | -P-Cha-G-M- <i>K</i> -G-                        | 8.21                   | 4.24               | 2.61                | 14.88               | 1.95                 | 1.44                   | 1.02        |

458 **Table S4.** Relative enzymatic specificity of the Generation 1 compounds (at 10  $\mu$ M) with  
 459 excitation/emission at 485/528nm. Recombinant human catalytic domain MMPs -2, -9, -12, -13 were  
 460 used at 30nM. Neutrophil elastase was used at 30 nM, neutrophil lysate was used neat. Recombinant  
 461 human Thrombin was used at 5U/ml. Cleavage site for each sequence is indicated in italics. As shown  
 462 below probe 1 was rapidly cleaved by Plasmin while 9 was observed to be stable to Plasmin.

463



464

Seq ID No. **3** (G-P-K-G-I-K-G)  
+  
Elastase

465

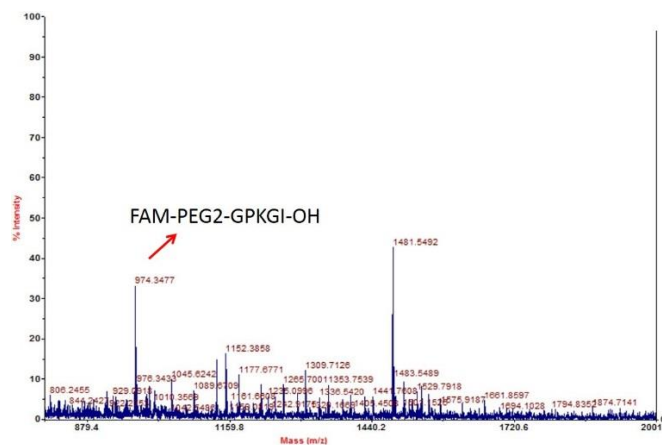

466 **Figure S16.** Seq ID No. 3 was cleaved with elastase (G-P-K-G-I ↑ K-G)

Seq ID No. **8** (P-F-G-I-K-βA)  
+  
Elastase

467

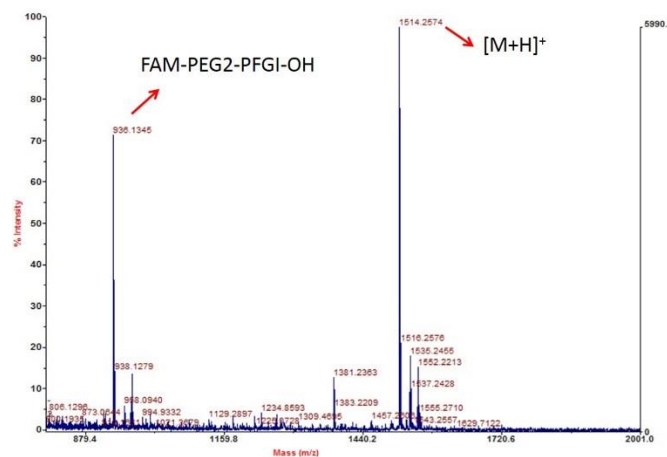

468 **Figure S17.** Seq ID No. 8 was cleaved with elastase (P-F-G-I ↑ K-βA)

469

470

471

472

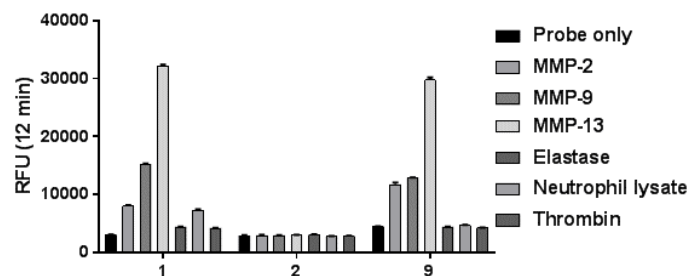

473

474 **Figure S18.** Seq ID No. 1 and 9 were cleaved by MMP-2, -9 and -13 but not with Elastase, Neutrophil  
475 lysate and Thrombin, while control compound **2** was not cleaved with any of these proteases as  
476 expected.

477

Seq ID No. 1 (GPKGLKG)

Seq ID No. 1 (GPKGLKG)  
+  
MMP-9

Seq ID No. 1 (GPKGLKG)  
+  
Elastase

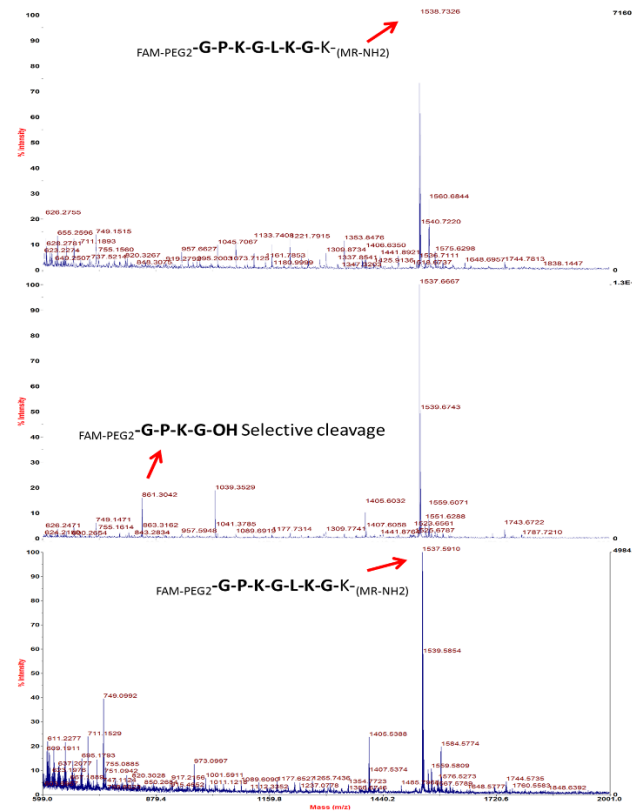

479  
480  
481

Seq ID No. 9 (PFGNleKβA)

Seq ID No. 9 (PFGNleKβA)  
+  
MMP-9

Seq ID No. 9 (PFGNleKβA)  
+  
Elastase

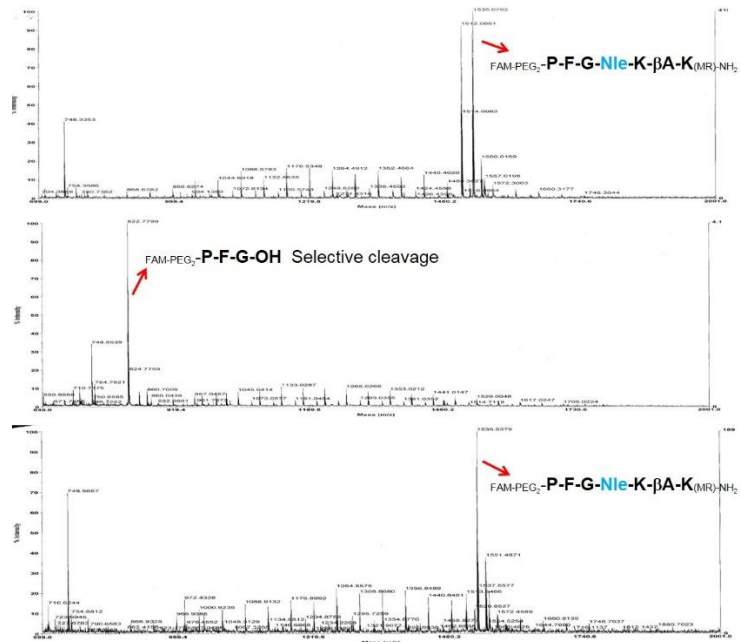

482

483 **Figure S19.** Seq ID No. 1 (GPKGLKG) and No. 9 (PFGNleKβA) were cleaved by MMP-9 and stable  
484 to Elastase as showed by MALDI TOF MS analysis.

485

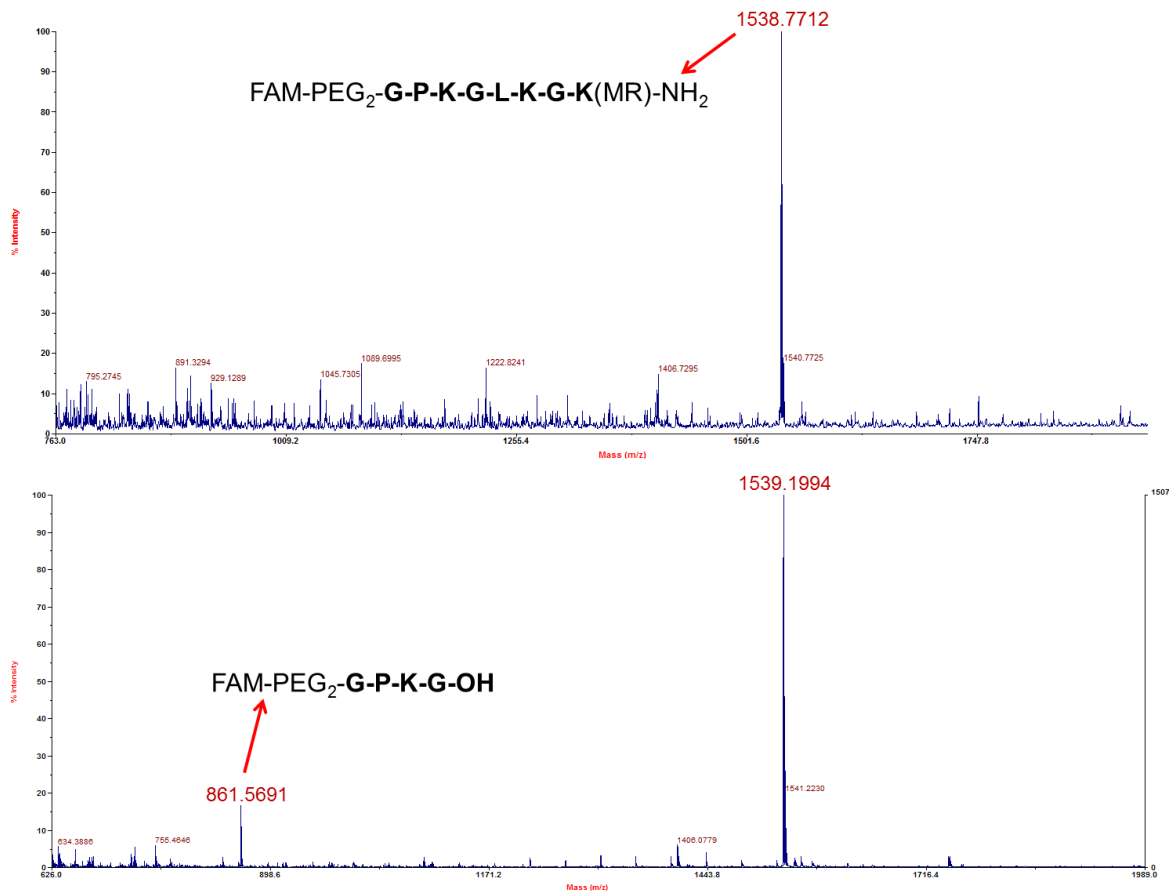

486

487 **Figure S20.** MALDI TOF MS of compound 1-G1 with healthy (upper) and fibrotic lung tissue (lower)

488

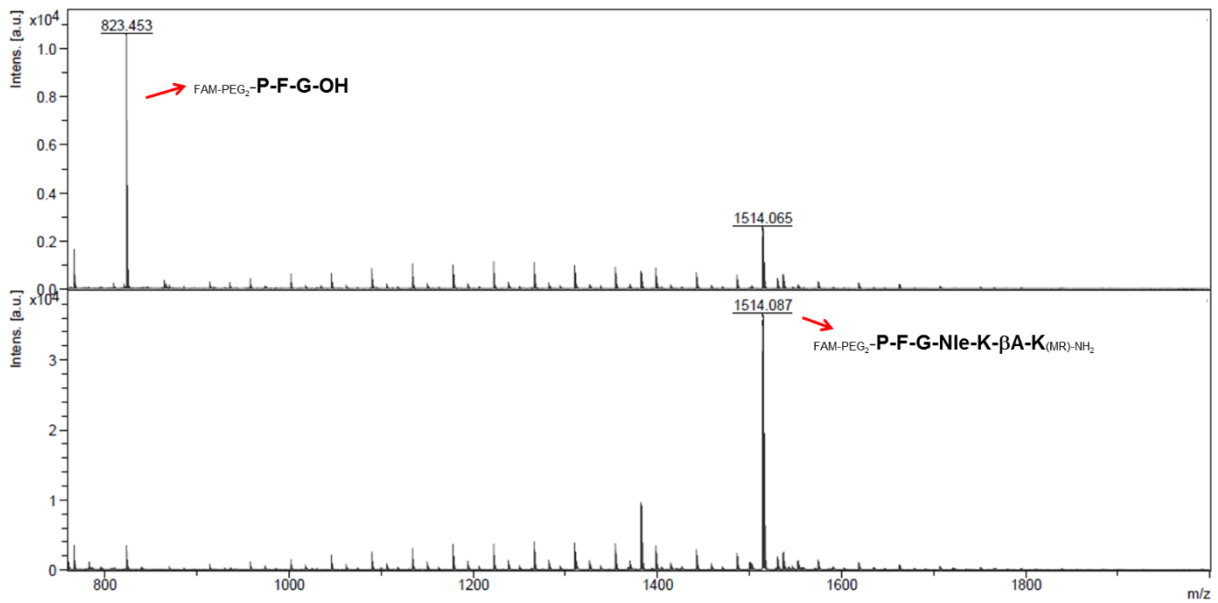

489

490 **Figure S21.** MALDI TOF MS of compound 9-G1 with fibrotic lung tissue (upper) and tissue incubated  
491 with Marimastat (lower)

492

493 **Next Generation Probes:**

494 For the next generation probes sequences 1 and 9 were incorporated into peptides that were stabilised  
 495 with various hydrophilic tails (added in order to improve the aqueous solubility and prevent  
 496 exopeptidase cleavage. The two selected sequences 1 and 9 were thus flanked by ethylenglycol units  
 497 (8-amino-3,6-dioxaoctanoic acids) and Lys or D-Lys residues giving the Generation-2, -3 and -4  
 498 compounds (Figure S22).

499 With the second generation of probes, the selectivity for MMPs and Plasmin was evaluated.

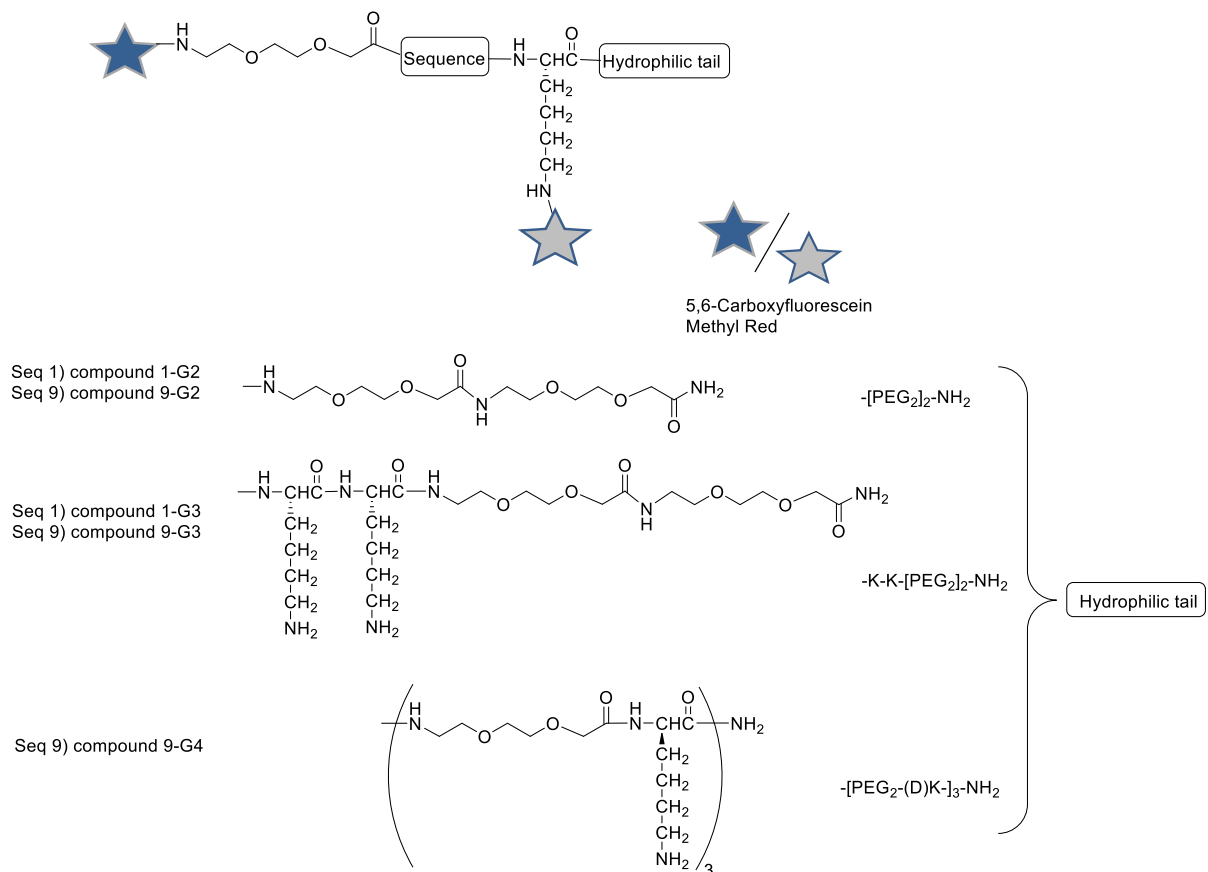

500

501 **Figure S22.** Structures of compounds in Generation-2, -3 and -4

502 **a) MMPs vs Plasmin selectivity:**

503 Experiments with MMP-9,-13 and plasmin were carried out in parallel with the selected sequences.  
 504 Comparison of results provided by compounds 1-G2 and 9-G2 indicated that sequence 1 was cleaved  
 505 by plasmin while sequence 9 was totally plasmin resistant. MALDI TOF MS analysis (Figure S23-S24)  
 506 was carried out and plasmin cleavage site for sequence 1 was identified as (-G-P-K↑G-L-K-G-).  
 507 Attempts to make a resistant version replacing the lysine residue with D-aminoacids (-G-P-(D)K-G-L-  
 508 K-G-) resulted in the failure of enzymatic recognition by the MMPs.

509

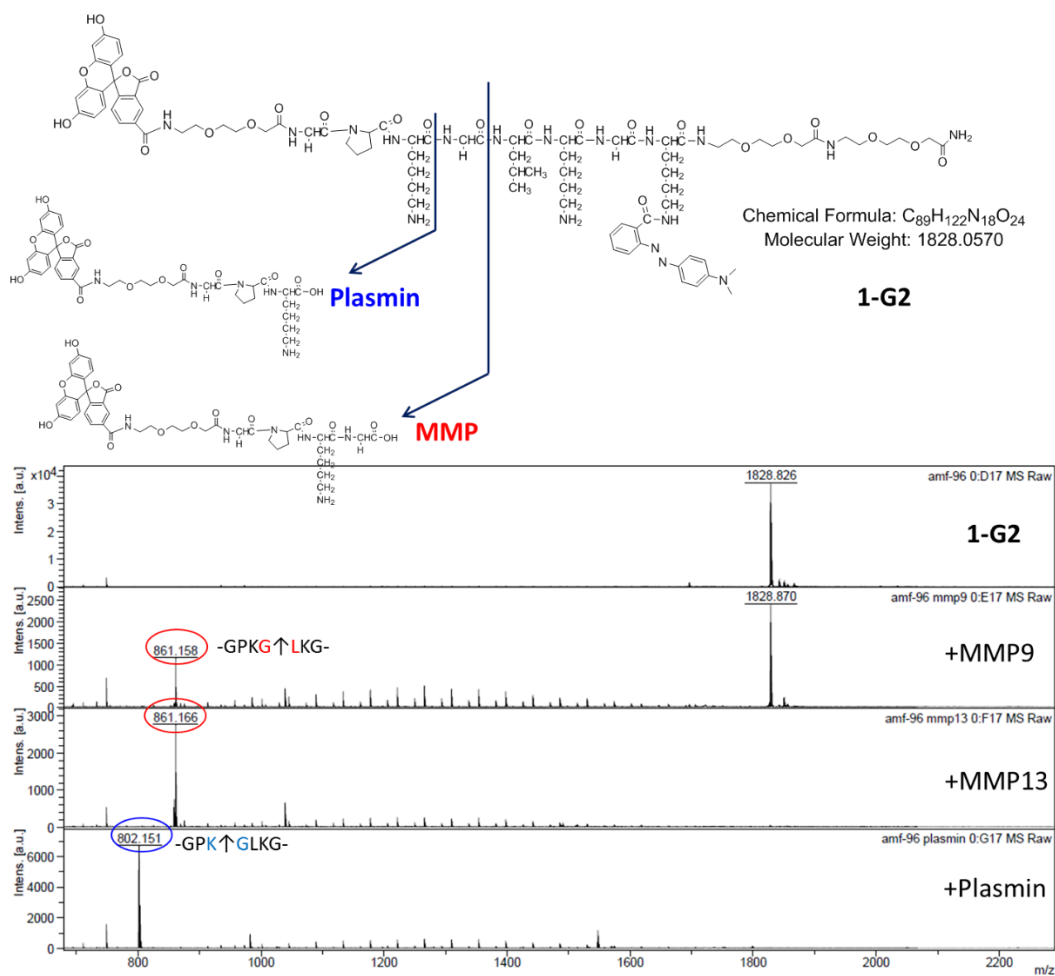

510

511 **Figure S23.** MALDI TOF MS spectra of compound 1-G2 with the different MMPs and Plasmin

512

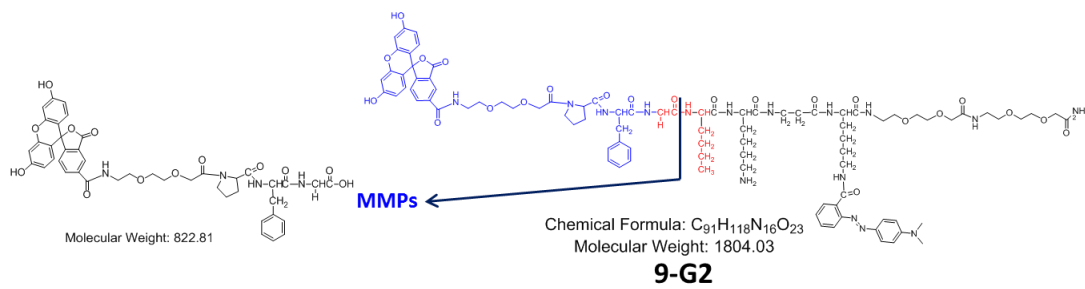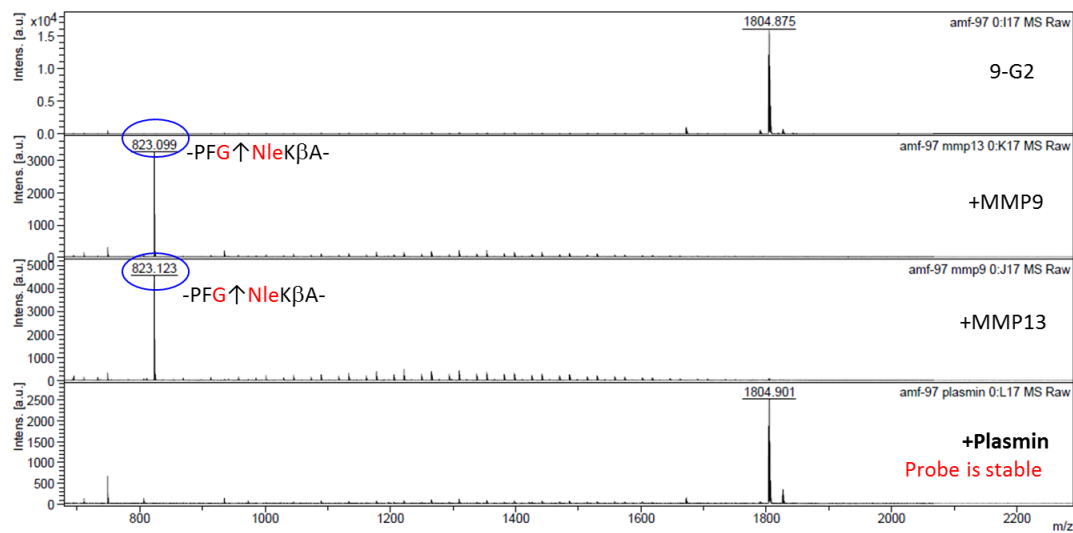

513

514

**Figure S24.** MALDI TOF MS spectra of compound 9-G2 with the different MMPs and Plasmin

515

516 **b) Hydrophilic tail optimization:**

517 The combination of PEG units with Lysine increased the aqueous solubility progressively with each  
518 generation although the fragment  $-K-K-(PEG_2)_2-NH_2$  used in generation 3 (compounds 1-G3 and 9-  
519 G3) was unspecifically cleaved when the probes were assayed in tissue homogenate (Figure S25). A  
520 final iteration with the plasmin resistant sequence 9 (compound 9-G4) was synthesized containing as a  
521 hydrophilic tail alternate *D*-Lys as a non-natural aminoacid and PEG units resulting in good solubility  
522 and stability as confirmed by MALDI TOF MS and HPLC analysis. The fluorescence increase was  
523 selective for MMPs over plasmin (Fig S26).

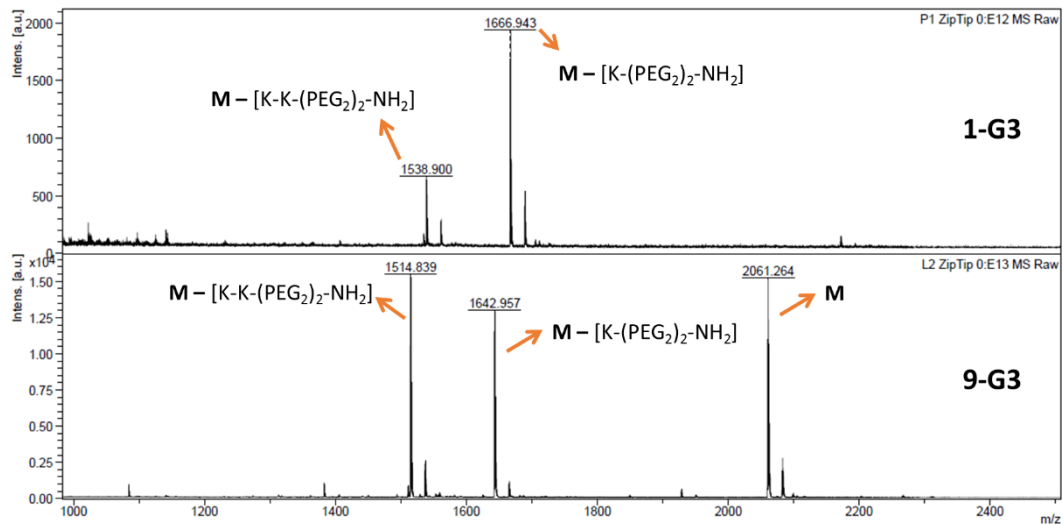

524

525 **Figure S25.** MALDI TOF MS spectra for 1-G3 (upper) and 9-G3 (lower) when incubated with healthy  
526 (homogenised) human lung tissue showing cleavage of the hydrophilic tail  $\uparrow-K\uparrow-K-(PEG_2)_2-NH_2$

527

528

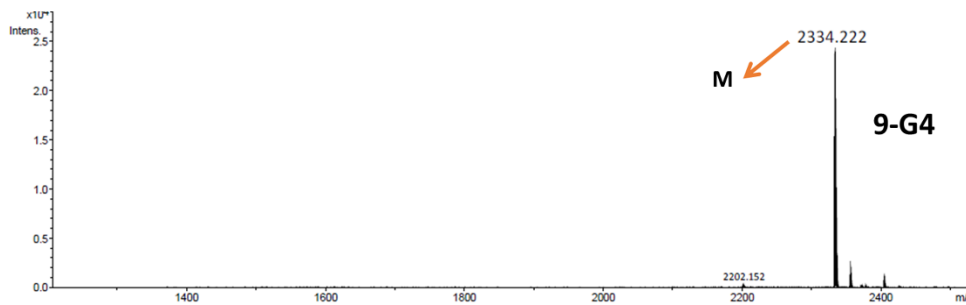

529

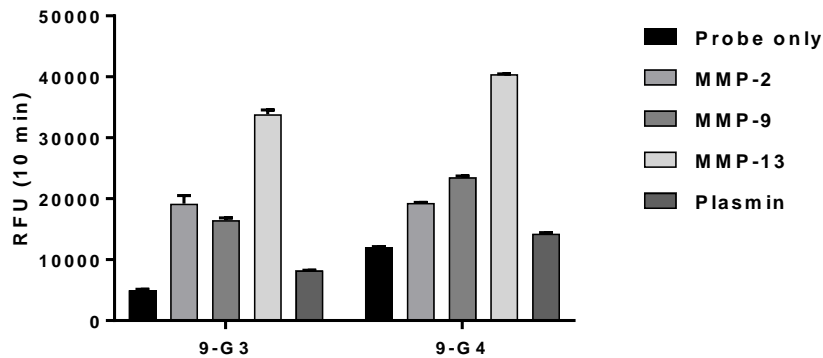

530

531 **Figure S26.** (upper) MALDI TOF MS spectra of 9-G4 when incubated with homogenised healthy  
532 human lung tissue showing stabilising effect of the hydrophilic tail  $-\text{[PEG}_2\text{-(D)K]}_3\text{-NH}_2$ . (lower)  
533 Fluorescence signal of compounds 9-G3 and 9-G4 in the presence of different enzymes.

534

535 In summary from these studies the optimized structure for the MMP probe was selected as PFGNleK $\beta$ A  
536 attached to the hydrophilic tail  $-\text{[PEG}_2\text{-(D)K]}_3\text{-NH}_2$  and this was used to construct the optimized dual-  
537 probe. The widely used MMP peptide GPKGLKG was shown to be non-viable due to its cleavage by  
538 endogenous enzymes such as Plasmin. Whilst the initial MMP-peptide sequence was chosen for  
539 gelatinases MMP-2 and MMP-9 selectivity<sup>[15]</sup> our final modified peptide sequence was also highly  
540 selective for MMP-13, a collagenase which along with MMP-2 and MMP-9 is upregulated within  
541 inflammatory microenvironments.<sup>[16]</sup> It is not wholly surprising that our peptide sequence was activated  
542 by these three different MMPs as they share common targets such as gelatin and several collagen sub-  
543 types.<sup>[17]</sup>

544

545



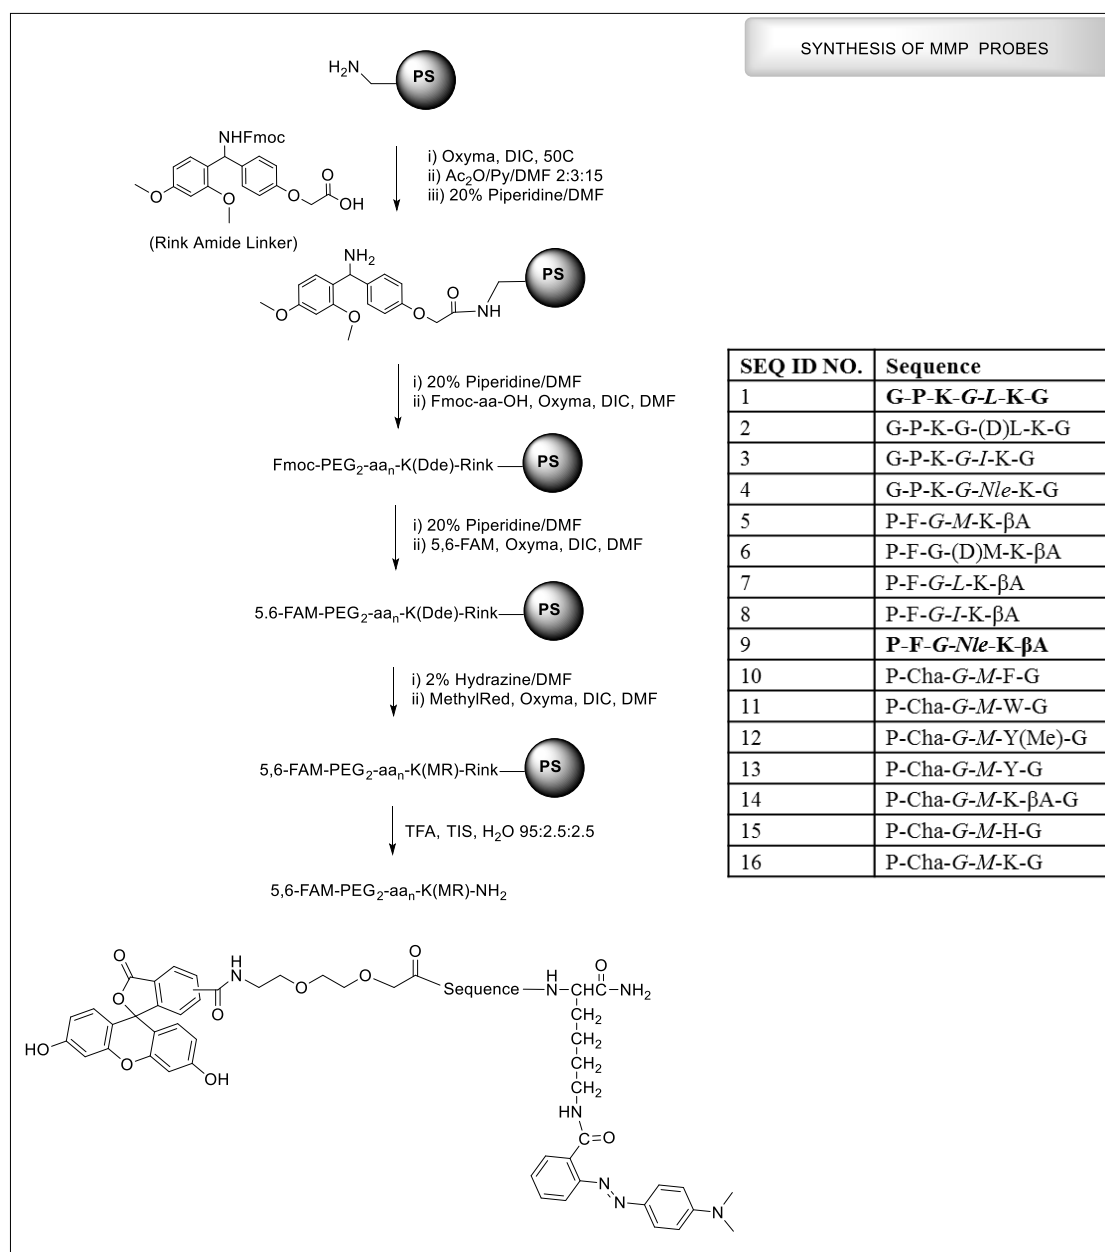

546

547 **Scheme S6.** MMP substrate optimization. Synthesis of the library of the Generation 1 FRET peptides  
 548 was carried out according to the general methods described above.

549

550 **Characterisation Table of MMP probes library (Generation 1 to Generation 4)**

| <b>Probe</b> | <b>Structure</b>                                                                         | <b>m/z<sub>calc</sub><br/>(Da)</b><br>[M+H] <sup>+</sup> | <b>MALDI-<br/>TOF</b><br><b>m/z (Da)</b> | <b>HPLC</b><br><b>t<sub>R</sub> (min)</b> |
|--------------|------------------------------------------------------------------------------------------|----------------------------------------------------------|------------------------------------------|-------------------------------------------|
| <b>1-G1</b>  | FAM-PEG <sub>2</sub> -(Seq1)-K(MR)-NH <sub>2</sub>                                       | 1537.74                                                  | 1538.20                                  | 6.357 <sup>b</sup>                        |
| <b>2-G1</b>  | FAM-PEG <sub>2</sub> -(Seq2)-K(MR)-NH <sub>2</sub>                                       | 1537.74                                                  | 1538.30                                  | 6.456 <sup>b</sup>                        |
| <b>3-G1</b>  | FAM-PEG <sub>2</sub> -(Seq3)-K(MR)-NH <sub>2</sub>                                       | 1538.71                                                  | 1538.21                                  | 6.259 <sup>b</sup>                        |
| <b>4-G1</b>  | FAM-PEG <sub>2</sub> -(Seq4)-K(MR)-NH <sub>2</sub>                                       | 1538.71                                                  | 1538.31                                  | 6.150 <sup>b</sup>                        |
| <b>5-G1</b>  | FAM-PEG <sub>2</sub> -(Seq5)-K(MR)-NH <sub>2</sub>                                       | 1530.66                                                  | 1531.80                                  | 5.390 <sup>c</sup>                        |
| <b>6-G1</b>  | FAM-PEG <sub>2</sub> -(Seq6)-K(MR)-NH <sub>2</sub>                                       | 1532.76                                                  | 1532.58                                  | 6.342 <sup>b</sup>                        |
| <b>7-G1</b>  | FAM-PEG <sub>2</sub> -(Seq7)-K(MR)-NH <sub>2</sub>                                       | 1514.72                                                  | 1514.66                                  | 6.394 <sup>b</sup>                        |
| <b>8-G1</b>  | FAM-PEG <sub>2</sub> -(Seq8)-K(MR)-NH <sub>2</sub>                                       | 1514.72                                                  | 1514.76                                  | 6.218 <sup>b</sup>                        |
| <b>9-G1</b>  | FAM-PEG <sub>2</sub> -(Seq9)-K(MR)-NH <sub>2</sub>                                       | 1514.72                                                  | 1514.68                                  | 6.330 <sup>b</sup>                        |
| <b>10-G1</b> | FAM-PEG <sub>2</sub> -(Seq10)-K(MR)-NH <sub>2</sub>                                      | 1542.65                                                  | 1543.70                                  | 6.744 <sup>c</sup>                        |
| <b>11-G1</b> | FAM-PEG <sub>2</sub> -(Seq11)-K(MR)-NH <sub>2</sub>                                      | 1582.79                                                  | 1582.60                                  | 6.669 <sup>c</sup>                        |
| <b>12-G1</b> | FAM-PEG <sub>2</sub> -(Seq12)-K(MR)-NH <sub>2</sub>                                      | 1573.70                                                  | 1573.60                                  | 6.714 <sup>c</sup>                        |
| <b>13-G1</b> | FAM-PEG <sub>2</sub> -(Seq13)-K(MR)-NH <sub>2</sub>                                      | 1558.65                                                  | 1558.60                                  | 6.307 <sup>c</sup>                        |
| <b>14-G1</b> | FAM-PEG <sub>2</sub> -(Seq14)-K(MR)-NH <sub>2</sub>                                      | 1537.70                                                  | 1538.70                                  | 5.552 <sup>c</sup>                        |
| <b>15-G1</b> | FAM-PEG <sub>2</sub> -(Seq15)-K(MR)-NH <sub>2</sub>                                      | 1532.65                                                  | 1532.60                                  | 5.522 <sup>c</sup>                        |
| <b>16-G1</b> | FAM-PEG <sub>2</sub> -(Seq16)-K(MR)-NH <sub>2</sub>                                      | 1524.69                                                  | 1524.70                                  | 5.586 <sup>c</sup>                        |
| <b>1-G2</b>  | FAM-PEG <sub>2</sub> -(Seq1)-K(MR)-PEG <sub>2</sub> -PEG <sub>2</sub> -NH <sub>2</sub>   | 1829.06                                                  | 1829.13                                  | 4.674 <sup>c</sup>                        |
| <b>9-G2</b>  | FAM-PEG <sub>2</sub> -(Seq9)-K(MR)-PEG <sub>2</sub> -PEG <sub>2</sub> -NH <sub>2</sub>   | 1827.02 <sup>a</sup>                                     | 1827.09 <sup>a</sup>                     | 4.773 <sup>c</sup>                        |
| <b>1-G3</b>  | FAM-PEG <sub>2</sub> -(Seq1)-K(MR)-K-K-[PEG <sub>2</sub> ] <sub>2</sub> -NH <sub>2</sub> | 2085.41                                                  | 2085.31                                  | 3.254 <sup>c</sup>                        |
| <b>9-G3</b>  | FAM-PEG <sub>2</sub> -(Seq9)-K(MR)-K-K-[PEG <sub>2</sub> ] <sub>2</sub> -NH <sub>2</sub> | 2061.39                                                  | 2061.39                                  | 3.958 <sup>c</sup>                        |
| <b>9-G4</b>  | MR-PEG <sub>2</sub> -(Seq9)-K(FAM)-[PEG <sub>2</sub> -k] <sub>3</sub> -NH <sub>2</sub>   | 2334.72                                                  | 2334.22                                  | 3.823 <sup>c</sup>                        |

551 **Table S5.** <sup>a</sup> [M+Na]<sup>+</sup>; Analytical HPLC: Flow rate of 1 mL/min and detection at 254, 495 nm and by  
552 evaporative light scattering. <sup>b</sup> Elution with H<sub>2</sub>O/CH<sub>3</sub>CN/HCOOH (95/5/0.1) to H<sub>2</sub>O/CH<sub>3</sub>CN/HCOOH  
553 (5/95/0.1), over 10 min, holding at 95% ACN for 4 min; <sup>c</sup> Elution with H<sub>2</sub>O/CH<sub>3</sub>CN/HCOOH (95/5/0.1)  
554 to H<sub>2</sub>O/CH<sub>3</sub>CN/HCOOH (5/95/0.1), over 6 min, holding at 95% ACN for 2 min.

555

556

558 **REFERENCES**

- 559 [1] B. Amulic, C. Cazalet, G. L. Hayes, K. D. Metzler, A. Zychlinsky, *Annual Review of Immunology*  
560 **2012**, *30*, 459-489.
- 561 [2] a) J. Pugin, M. C. Widmer, S. Kossodo, C. M. Liang, H. L. n. Preas, A. F. Suffredini, *Am J Respir*  
562 *Cell Mol Biol* **1999**, *20*, 458-464; b) V. C. Ardi, T. A. Kupriyanova, E. I. Deryugina, J. P. Quigley,  
563 *Proc Natl Acad Sci U S A* **2007**, *104*, 20262-20267.
- 564 [3] G. Ferry, M. Lonchamp, L. Pennel, G. de Nanteuil, E. Canet, G. C. Tucker, *FEBS Lett* **1997**,  
565 *402*, 111-115.
- 566 [4] G. T. Gerotziafas, I. Elalamy, F. Depasse, E. Perzborn, M. M. Samama, *J Thromb Haemost*  
567 **2007**, *5*, 886-888.
- 568 [5] S. Takahashi, W. Piao, Y. Matsumura, T. Komatsu, T. Ueno, T. Terai, T. Kamachi, M. Kohno, T.  
569 Nagano, K. Hanaoka, *Journal of the American Chemical Society* **2012**, *134*, 19588-19591.
- 570 [6] M. Gude, J. Ryf, P. D. White, *Letters in Peptide Science* **2002**, *9*, 203-206.
- 571 [7] J. J. Diaz-Mochon, L. Bialy, M. Bradley, *Org. Lett.* **2004**, *6*, 1127-1129.
- 572 [8] D. P. Nguyen, H. Lusic, H. Neumann, P. B. Kapadnis, A. Deiters, J. W. Chin, *Journal of the*  
573 *American Chemical Society* **2009**, *131*, 8720-8721.
- 574 [9] R. C. Brown, Z. Li, A. J. Rutter, X. Mu, O. H. Weeks, K. Smith, I. Weeks, *Organic &*  
575 *Biomolecular Chemistry* **2009**, *7*, 386-394.
- 576 [10] M. Lopalco, E. N. Koini, J. K. Cho, M. Bradley, *Org. Biomol. Chem.* **2009**, *7*, 856-859.
- 577 [11] V. Hong, S. I. Presolski, C. Ma, M. G. Finn, *Angewandte Chemie International Edition* **2009**,  
578 *48*, 9879-9883.
- 579 [12] A. G. Rossi, J. C. McCutcheon, N. Roy, E. R. Chilvers, C. Haslett, I. Dransfield, *The Journal of*  
580 *Immunology* **1998**, *160*, 3562-3568.
- 581 [13] N. Krstajić, B. Mills, I. Murray, A. Marshall, D. Norberg, T. H. Craven, P. Emanuel, T. R.  
582 Choudhary, G. O. S. Williams, E. Scholefield, A. R. Akram, A. Davie, N. Hirani, A. Bruce, A.  
583 Moore, M. Bradley, K. Dhaliwal, *J. Biomed. Opt* **2018**, *23*, 076005.
- 584 [14] K. Dhaliwal, E. Scholefield, D. Ferenbach, M. Gibbons, R. Duffin, D. A. Dorward, A. C. Morris,  
585 D. Humphries, A. MacKinnon, T. S. Wilkinson, W. A. H. Wallace, N. van Rooijen, M. Mack, A.  
586 G. Rossi, D. J. Davidson, N. Hirani, J. Hughes, C. Haslett, A. J. Simpson, *American Journal of*  
587 *Respiratory and Critical Care Medicine* **2012**, *186*, 514-524.
- 588 [15] A. Prudova, U. auf dem Keller, G. S. Butler, C. M. Overall, *Molecular & Cellular Proteomics*  
589 **2010**, *9*, 894-911.
- 590 [16] a) G. Shay, C. C. Lynch, B. Fingleton, *Matrix Biology* **2015**, *44-46*, 200-206; b) E. Hadler-Olsen,  
591 J. O. Winberg, L. Uhlin-Hansen, *Tumour Biol* **2013**, *34*, 2041-2051; c) L. Nissinen, V.-M.  
592 Kähäri, *Biochimica et Biophysica Acta (BBA) - General Subjects* **2014**, *1840*, 2571-2580.
- 593 [17] C. M. Overall, *Mol Biotechnol* **2002**, *22*, 51-86.
